# Supplementary material for: Ecological Niche Modelling Predicts Southward Expansion of Lutzomyia (Nyssomyia) flaviscutellata (Diptera: Psychodidae: Phlebotominae), Vector of Leishmania (Leishmania) amazonensis in South America, under Climate Change
Source: PLoS One. 2015 Nov 30;10(11):e0143282. doi: 10.1371/journal.pone.0143282 (PMC4664266; doi:10.1371/journal.pone.0143282)
Supplement: S1 Table — (XLSX) [file pone.0143282.s010.xlsx]

## Sheet: Title
S1 Table: Lutzomyia flaviscutellata occurrence database.
Label	Information
id	Unique identifying number of occurrence record
species	Species name
admin_0	Country
admin_1	State/Province
admin_2	Department/Municipality
lat	Latitude in decimal degrees (WGS84)
lon	Longitude in decimal degrees (WGS84)
unique	1=unique record; dupX= duplicate of record with id X
ref	Reference (citation)
comp_ref	Complete reference
Supplementary file from manuscript:
Ecological niche modelling predicts southward expansion of Lutzomyia (Nyssomyia) flaviscutellata (Diptera: Psychodidae: Phlebotominae), vector of Leishmania (Leishmania) amazonensis in South America, under climate change
Authors: Carvalho BM, Ready PD, Rangel EF, Vale MM.

## Sheet: Records
id	species	admin_0	admin_1	admin_2	lat	lon	unique	ref
1	L. flaviscutellata	Trinidad and Tobago			10.392	-61.0389	1	Aitken et al. 1968
2	L. flaviscutellata	Brazil	Pará	Belém	-1.44054	-48.3861	1	Aitken et al. 1975
3	L. flaviscutellata	Brazil	Pará	Belém	-	-	dup 258	Aitken et al. 1975
4	L. flaviscutellata	Brazil	Amazonas	Presidente Figueiredo	-0.740579	-60.1182	1	Alencar et al. 2011
6	L. flaviscutellata	Ecuador	Sucumbios		-	-	dup 469	Alexander et al. 1992
7	L. flaviscutellata	Brazil	Mato Grosso do Sul	Rio Verde de Mato Grosso	-18.918	-54.844	1	Almeida et al. 2013
8	L. flaviscutellata	Brazil	Amazonas	Presidente Figueiredo	-2.05064	-59.9695	1	Alves et al. 2011
9	L. flaviscutellata	Brazil	Amazonas	Presidente Figueiredo	-2.05046	-59.9686	1	Alves et al. 2011
10	L. flaviscutellata	Brazil	Amazonas	Borba	-4.48333	-58.5706	1	Alves et al. 2012
11	L. flaviscutellata	Brazil	Amazonas	Maués	-4.59694	-58.2206	1	Alves et al. 2012
12	L. flaviscutellata	Brazil	Amazonas	Maués	-5.2525	-58.6978	1	Alves et al. 2012
13	L. flaviscutellata	Brazil	Amazonas	Nhamundá	-1.895	-57.0569	1	Alves et al. 2012
14	L. flaviscutellata	Brazil	Amazonas	Nhamundá	-1.58944	-57.6183	1	Alves et al. 2012
15	L. flaviscutellata	Brazil	Amazonas	Nhamundá	-1.58833	-57.6256	1	Alves et al. 2012
16	L. flaviscutellata	Brazil	Mato Grosso do Sul	Bonito	-	-	dup 341	Andrade et al. 2009
17	L. flaviscutellata	Brazil	Tocantins	Monte do Carmo	-10.7633	-48.1089	1	Andrade Filho et al. 2001
18	L. flaviscutellata	Brazil	Tocantins	Porto Nacional	-10.7081	-48.4172	1	Andrade Filho et al. 2001
19	L. flaviscutellata	Brazil	Rio de Janeiro	Angra dos Reis	-23.1625	-44.3507	1	Araujo-Filho et al. 1981
20	L. flaviscutellata	Brazil	Amazonas	Manaus	-2.87914	-59.9947	1	Arias & Freitas 1977
21	L. flaviscutellata	Brazil	Amazonas	Manaus	-	-	dup 20	Arias & Freitas 1978
22	L. flaviscutellata	Brazil	Acre	Cruzeiro do Sul	-7.64579	-72.6859	1	Arias & Freitas 1982a
23	L. flaviscutellata	Brazil	Acre	Rio Branco	-9.95926	-67.7726	1	Arias & Freitas 1982a
24	L. flaviscutellata	Brazil	Amazonas	Manaus	-	-	dup 68	Arias & Freitas 1982b
25	L. flaviscutellata	Brazil	Amazonas	Careiro da Várzea	-3.31713	-59.8778	1	Arias et al. 1985
26	L. flaviscutellata	Brazil	Amazonas	Manaus	-3.07279	-60.0133	1	Arias et al. 1985
27	L. flaviscutellata	Brazil	Pará	Breu Branco	-3.79396	-49.576	1	Arias et al. 1985
28	L. flaviscutellata	Brazil	Rondônia	Porto Velho	-8.64794	-64.0009	1	Arias et al. 1985
29	L. flaviscutellata	Brazil	Rondônia	Porto Velho	-8.79841	-63.7296	1	Arias et al. 1985
30	L. flaviscutellata	Brazil	Pará	São Domingos do Capim	-1.76667	-47.7733	1	Ayres 2011
31	L. flaviscutellata	Brazil	Rondônia	Porto Velho	-8.71028	-63.1715	1	Azevedo et al. 1993
32	L. flaviscutellata	Brazil	Mato Grosso	Peixoto de Azevedo	-10.229	-54.983	1	Azevedo et al. 2002
33	L. flaviscutellata	Brazil	Acre	Bujari	-9.45917	-68.2119	1	Azevedo et al. 2008
34	L. flaviscutellata	Brazil	Acre	Rio Branco	-10.0371	-67.794	1	Azevedo et al. 2008
35	L. flaviscutellata	Brazil	Acre	Xapuri	-10.6506	-68.4919	1	Azevedo et al. 2008
36	L. flaviscutellata	Brazil	Maranhão	São José de Ribamar	-2.65306	-44.1269	1	Azevedo et al. 2011
37	L. flaviscutellata	Brazil	Maranhão	São José de Ribamar	-2.64667	-44.1445	1	Azevedo et al. 2011
38	L. flaviscutellata	Brazil	Pernambuco	Recife	-8.00556	-34.9454	1	Balbino et al. 2005a
39	L. flaviscutellata	Brazil	Pernambuco	Recife	-	-	dup 38	Balbino et al. 2005b
40	L. flaviscutellata	Brazil	Amazonas	Manaus	-2.95016	-60.0219	1	Barbosa et al. 2008
41	L. flaviscutellata	Colombia	Putumayo		0.508031	-76.4799	1	Barreto et al. 2000
42	L. flaviscutellata	Colombia	Putumayo		0.638714	-76.4781	1	Barreto et al. 2000
43	L. flaviscutellata	Brazil	Amazonas	Tefé	-3.67833	-64.3583	1	Barrett et al. 1996
44	L. flaviscutellata	Brazil	Maranhão	Paço do Lumiar	-2.532	-44.108	1	Barros et al. 2000
45	L. flaviscutellata	Peru	San Martín	Morales	-6.47478	-76.3835	1	Beati et al. 2004
46	L. flaviscutellata	Colombia	Amazonas		-	-	dup 321	Bejarano 2006
47	L. flaviscutellata	Colombia	Chocó		-	-	dup 149	Bejarano 2006
48	L. flaviscutellata	Colombia	Norte de Santander		-	-	dup 473	Bejarano 2006
49	L. flaviscutellata	Colombia	Putumayo		-	-	dup 41	Bejarano 2006
50	L. flaviscutellata	Brazil	Mato Grosso	Chapada dos Guimarães	-15.461	-55.75	1	Biancardi & Castellon 2000
51	L. flaviscutellata	Brazil	Mato Grosso	Chapada dos Guimarães	-	-	dup 50	Biancardi & Castellon 2000
52	L. flaviscutellata	Brazil	Mato Grosso	Chapada dos Guimarães	-	-	dup 50	Biancardi & Castellon 2000
53	L. flaviscutellata	Brazil	Rondônia	Ariquemes	-9.86226	-63.0287	1	Biancardi et al. 1982
54	L. flaviscutellata	Brazil	Rondônia	Candeias	-8.80465	-63.7093	1	Biancardi et al. 1982
55	L. flaviscutellata	Brazil	Rondônia	Candeias	-8.83548	-63.3906	1	Biancardi et al. 1982
56	L. flaviscutellata	Brazil	Rondônia	Porto Velho	-8.72473	-63.9662	1	Biancardi et al. 1982
57	L. flaviscutellata	Brazil	Amapá	Macapá	0.091667	-51.175	1	Brazil et al. 2000
572	L. flaviscutellata	Brazil	Mato Grosso	Jaciara	-15.9812	-54.9664	1	Brito et al. 2014
568	L. flaviscutellata	Brazil	Pará	Tracuateua	-1.24307	-46.9567	1	Bruno M. Carvalho, personal communication
569	L. flaviscutellata	Brazil	Pará	Bragança	-1.28259	-46.9689	1	Bruno M. Carvalho, personal communication
570	L. flaviscutellata	Brazil	Pará	Bragança	-1.27769	-46.9365	1	Bruno M. Carvalho, personal communication
571	L. flaviscutellata	Brazil	Pará	Bragança	-1.24673	-46.9508	1	Bruno M. Carvalho, personal communication
58	L. flaviscutellata	Suriname	Brokopondo		5.14258	-55.071	1	Burgos & Hudson 1994
59	L. flaviscutellata	Suriname	Brokopondo		5.11734	-55.2734	1	Burgos & Hudson 1994
60	L. flaviscutellata	Suriname	Marowijne		5.43363	-54.5213	1	Burgos & Hudson 1994
61	L. flaviscutellata	Suriname	Para		5.38115	-54.9162	1	Burgos & Hudson 1994
62	L. flaviscutellata	Suriname	Para		5.43927	-55.3104	1	Burgos & Hudson 1994
63	L. flaviscutellata	Suriname	Para		5.37731	-55.4938	1	Burgos & Hudson 1994
64	L. flaviscutellata	Suriname	Para		5.21356	-55.8134	1	Burgos & Hudson 1994
65	L. flaviscutellata	Suriname	Sipaliwini		-	-	dup 249	Burgos & Hudson 1994
66	L. flaviscutellata	Suriname	Sipaliwini		-	-	dup 250	Burgos & Hudson 1994
67	L. flaviscutellata	Suriname	Sipaliwini		4.34851	-54.4047	1	Burgos & Hudson 1994
68	L. flaviscutellata	Brazil	Amazonas	Manaus	-3.00412	-59.941	1	Cabanillas & Castellon 1999
69	L. flaviscutellata	Peru	Loreto	Yurimaguas	-5.76155	-76.1813	1	Cabanillas et al. 2001
70	L. flaviscutellata	Colombia	Guaviare	Calamar	1.95833	-72.6583	1	Cabrera et al. 2009
71	L. flaviscutellata	Colombia	Guaviare	El Retorno	2.09167	-72.5417	1	Cabrera et al. 2009
72	L. flaviscutellata	Colombia	Guaviare	Miraflores	1.34167	-71.9417	1	Cabrera et al. 2009
73	L. flaviscutellata	Colombia	Guaviare	San José del Guaviare	2.35833	-72.825	1	Cabrera et al. 2009
74	L. flaviscutellata	Colombia	Guaviare	San José del Guaviare	2.30833	-73.075	1	Cabrera et al. 2009
75	L. flaviscutellata	Brazil	Maranhão	Itapecuru Mirim	-3.48033	-44.3805	1	Campos et al. 2013
76	L. flaviscutellata	Brazil	Maranhão	Itapecuru Mirim	-3.47261	-44.3492	1	Campos et al. 2013
78	L. flaviscutellata	Brazil	Maranhão	São José de Ribamar	-2.55833	-44.125	1	Carvalho et al. 2000
79	L. flaviscutellata	Brazil	Distrito Federal	Brasília	-15.9748	-48.1816	1	Carvalho et al. 2010
80	L. flaviscutellata	Brazil	Distrito Federal	Brasília	-15.5737	-47.6035	1	Carvalho et al. 2010
77	L. flaviscutellata	Brazil	Rio de Janeiro	Angra dos Reis	-23.1338	-44.1727	1	Carvalho et al., 2013
81	L. flaviscutellata	Brazil	Roraima	Paracaima	4.46675	-61.1458	1	Castellón et al. 1991a
82	L. flaviscutellata	Brazil	Roraima	Amajari	3.36334	-61.4333	1	Castellón et al. 1991b
83	L. flaviscutellata	Brazil	Amazonas	Beruri	-4.48092	-61.0859	1	Castellón et al. 1994
84	L. flaviscutellata	Brazil	Amazonas	Beruri	-4.75121	-61.3144	1	Castellón et al. 1994
85	L. flaviscutellata	Brazil	Amazonas	Careiro	-3.62967	-60.2518	1	Castellón et al. 1994
86	L. flaviscutellata	Brazil	Amazonas	Careiro	-3.404	-59.9011	1	Castellón et al. 1994
87	L. flaviscutellata	Brazil	Amazonas	Humaitá	-7.00811	-63.1093	1	Castellón et al. 1994
88	L. flaviscutellata	Brazil	Amazonas	Tapauá	-6.2181	-62.6848	1	Castellón et al. 1994
89	L. flaviscutellata	Brazil	Amazonas	Tapuá	-5.50866	-62.1312	1	Castellón et al. 1994
90	L. flaviscutellata	Brazil	Amazonas	Coari	-4.89825	-65.1995	1	Castellón et al. 2000
91	L. flaviscutellata	Brazil	Amazonas	Coari	-4.82611	-65.2606	1	Castellón et al. 2000
92	L. flaviscutellata	Brazil	Amazonas	Itacoatiara	-	-	dup 130	Castellón-Bermúdez 2009
93	L. flaviscutellata	Brazil	Amazonas	Manaus	-	-	dup 165	Castellón-Bermúdez 2009
94	L. flaviscutellata	Brazil	Bahia	Cachoeira	-12.5996	-38.9671	1	Castellón-Bermúdez 2009
95	L. flaviscutellata	Brazil	Bahia	Entre Rios	-11.943	-38.0736	1	Castellón-Bermúdez 2009
96	L. flaviscutellata	Brazil	Bahia	Inhambupe	-11.7885	-38.3537	1	Castellón-Bermúdez 2009
97	L. flaviscutellata	Brazil	Bahia	Pojuca	-12.4298	-38.3266	1	Castellón-Bermúdez 2009
98	L. flaviscutellata	Brazil	Bahia	Salvador	-	-	dup 524	Castellón-Bermúdez 2009
99	L. flaviscutellata	Brazil	Bahia	Valença	-13.3665	-39.0711	1	Castellón-Bermúdez 2009
100	L. flaviscutellata	Brazil	Pará	Benevides	-	-	dup 546	Castellón-Bermúdez 2009
101	L. flaviscutellata	Brazil	Pará	Salvaterra	-0.775	-48.525	1	Castellón-Bermúdez 2009
102	L. flaviscutellata	Brazil	Pará	São Geraldo do Araguaia	-6.39313	-48.5578	1	Castellón-Bermúdez 2009
103	L. flaviscutellata	Brazil	Pernambuco	Amaraji	-8.38306	-35.4525	1	Castellón-Bermúdez 2009
104	L. flaviscutellata	Brazil	Pernambuco	Paudalho	-7.89667	-35.1797	1	Castellón-Bermúdez 2009
105	L. flaviscutellata	Brazil	Pernambuco	Recife	-8.05389	-34.8817	1	Castellón-Bermúdez 2009
106	L. flaviscutellata	Brazil	Roraima	Alto Alegre	2.98796	-61.3071	1	Castellón-Bermúdez 2009
107	L. flaviscutellata	Brazil	Roraima	Boa Vista	2.80658	-60.7013	1	Castellón-Bermúdez 2009
108	L. flaviscutellata	Brazil	Roraima	Mucajaí	2.55306	-61.3075	1	Castellón-Bermúdez 2009
109	L. flaviscutellata	Brazil	Roraima	São João da Baliza	0.946874	-59.911	1	Castellón-Bermúdez 2009
110	L. flaviscutellata	Brazil	Roraima	São Luís	1.01203	-60.0406	1	Castellón-Bermúdez 2009
115	L. flaviscutellata	Brazil	Roraima	Rorainopolis	0.45	-61.6833	1	Castellón-Bermúdez 2009
116	L. flaviscutellata	Brazil	Roraima	Amajari	4.05	-64.3667	1	Castellón-Bermúdez 2009
130	L. flaviscutellata	Brazil	Amazonas	Itacoatiara	-3.143	-58.444	1	Damasceno et al. 1949
131	L. flaviscutellata	Brazil	Pará	Abaetetuba	-	-	dup 292	Damasceno et al. 1949
132	L. flaviscutellata	Brazil	Pará	Belém	-	-	dup 258	Damasceno et al. 1949
133	L. flaviscutellata	Brazil	Pará	Irituia	-1.769	-47.439	1	Damasceno et al. 1949
134	L. flaviscutellata	Brazil	Pará	Marabá	-	-	dup 418	Damasceno et al. 1949
135	L. flaviscutellata	Brazil	Pará	Nova Timboteua	-1.206	-47.386	1	Damasceno et al. 1949
136	L. flaviscutellata	Brazil	Pará	Peixe Boi	-1.192	-47.314	1	Damasceno et al. 1949
137	L. flaviscutellata	Brazil	Pará	Santa Isabel do Pará	-1.299	-48.161	1	Damasceno et al. 1949
138	L. flaviscutellata	Brazil	Pará	Santarém	-	-	dup 425	Damasceno et al. 1949
139	L. flaviscutellata	Brazil	Pará	São Miguel do Guamá	-1.627	-47.483	1	Damasceno et al. 1949
140	L. flaviscutellata	Brazil	Mato Grosso	Alta Floresta	-10.3792	-56.5066	1	De Luca et al. 2003
141	L. flaviscutellata	Brazil	Mato Grosso	Alta Floresta	-9.65149	-56.0302	1	De Luca et al. 2003
142	L. flaviscutellata	Brazil	Mato Grosso	Alta Floresta	-10.0282	-56.1841	1	De Luca et al. 2003
119	L. flaviscutellata	French Guiana	Cayenne	Saint-Georges	-	-	dup 268	Dedet et al. 1985
143	L. flaviscutellata	French Guiana	Cayenne	Montsinery	-	-	dup 178	Dedet et al. 1985
350	L. flaviscutellata	French Guiana	Cayenne	Montsinery	-	-	dup 178	Dedet et al. 1985
351	L. flaviscutellata	French Guiana	Cayenne	Sinnamary	-	-	dup 181	Dedet et al. 1985
144	L. flaviscutellata	Brazil	Amazonas	Manaus	-2.59701	-60.0546	1	Dias-Lima et al. 2002
145	L. flaviscutellata	Brazil	Amazonas	Manaus	-	-	dup 144	Dias-Lima et al. 2003
146	L. flaviscutellata	Brazil	Mato Grosso do Sul	Bela Vista	-22.0998	-56.5433	1	Dorval et al. 2007
147	L. flaviscutellata	Brazil	Mato Grosso do Sul	Bela Vista	-	-	dup 146	Dorval et al. 2009
148	L. flaviscutellata	Brazil	Mato Grosso do Sul	Bela Vista	-	-	dup 146	Dorval et al. 2010
150	L. flaviscutellata	Brazil	Amazonas	Manaus	-	-	dup 68	Fairchild & Theodor 1971
151	L. flaviscutellata	Brazil	Distrito Federal	Brasília	-15.698	-47.955	1	Fairchild & Theodor 1971
152	L. flaviscutellata	Brazil	Espírito Santo	Viana	-20.39	-40.496	1	Fairchild & Theodor 1971
153	L. flaviscutellata	Brazil	Pará	Ananindeua	-	-	dup 538	Fairchild & Theodor 1971
154	L. flaviscutellata	Brazil	Rio de Janeiro	Nova Iguaçu	-22.595	-43.4396	1	Fairchild & Theodor 1971
155	L. flaviscutellata	Brazil	Rio de Janeiro	Petrópolis	-	-	dup 296	Fairchild & Theodor 1971
156	L. flaviscutellata	French Guiana	Cayenne	Cayenne	-	-	dup 402	Fairchild & Theodor 1971
157	L. flaviscutellata	Brazil	Amazonas	São Gabriel da Cachoeira	-0.133126	-67.0924	1	Fé et al. 1998
158	L. flaviscutellata	Brazil	Amazonas	São Gabriel da Cachoeira	-0.341411	-66.5428	1	Fé et al. 1998
159	L. flaviscutellata	Brazil	Amazonas	São Gabriel da Cachoeira	-0.110444	-66.8759	1	Fé et al. 1998
160	L. flaviscutellata	Brazil	Amazonas	Manaus	-	-	dup 163	Feitosa & Castellon 2004
161	L. flaviscutellata	Brazil	Amazonas	Manaus	-	-	dup 165	Feitosa & Castellon 2004
162	L. flaviscutellata	Brazil	Amazonas	Manaus	-	-	dup 165	Feitosa & Castellon 2004
163	L. flaviscutellata	Brazil	Amazonas	Manaus	-3.0358	-60.0342	1	Feitosa & Castellon 2006
164	L. flaviscutellata	Brazil	Amazonas	Manaus	-	-	dup 163	Feitosa & Castellon 2006
165	L. flaviscutellata	Brazil	Amazonas	Manaus	-3.00154	-59.9344	1	Feitosa & Castellon 2006
166	L. flaviscutellata	Brazil	Amazonas	Manaus	-	-	dup 165	Feitosa & Castellon 2006
167	L. flaviscutellata	Brazil	Pará	Santarém	-	-	dup 425	Feitosa et al. 2012
168	L. flaviscutellata	Venezuela	Amazonas		0.758333	-66.2583	1	Feliciangeli 1988
169	L. flaviscutellata	Brazil	Maranhão	Raposa	-2.423	-44.103	1	Felipe et al. 2011
525	L. flaviscutellata	Brazil	Pará	Belém	-1.30933	-48.4313	1	Ferreira et al. 2014
526	L. flaviscutellata	Brazil	Pará	Belém	-1.3376	-48.4387	1	Ferreira et al. 2014
527	L. flaviscutellata	Brazil	Pará	Belém	-1.33246	-48.4537	1	Ferreira et al. 2014
528	L. flaviscutellata	Brazil	Pará	Belém	-1.41254	-48.4466	1	Ferreira et al. 2014
529	L. flaviscutellata	Brazil	Pará	Belém	-1.39642	-48.4657	1	Ferreira et al. 2014
530	L. flaviscutellata	Brazil	Pará	Belém	-1.41099	-48.4104	1	Ferreira et al. 2014
531	L. flaviscutellata	Brazil	Pará	Belém	-1.38291	-48.4895	1	Ferreira et al. 2014
170	L. flaviscutellata	Brazil	Amazonas	Lábrea	-7.45797	-64.7284	1	Figueira et al. 2013
171	L. flaviscutellata	Brazil	Amazonas	Lábrea	-	-	dup 170	Figueira et al. 2013
172	L. flaviscutellata	Brazil	Amazonas	Lábrea	-7.31963	-64.6876	1	Figueira et al. 2013
173	L. flaviscutellata	Brazil	Amazonas	Lábrea	-7.26054	-64.7798	1	Figueira et al. 2013
174	L. flaviscutellata	French Guiana	Cayenne		-	-	dup 268	Floch & Abonnenc 1952
175	L. flaviscutellata	Brazil	Amazonas	Manaus	-	-	dup 68	Forattini 1973
176	L. flaviscutellata	Brazil	Pará	Belém	-	-	dup 258	Forattini 1973
177	L. flaviscutellata	French Guiana	Cayenne	Cacao	4.56091	-52.4719	1	Fouque et al. 2007
178	L. flaviscutellata	French Guiana	Cayenne	Montsinery	4.89478	-52.5021	1	Fouque et al. 2007
179	L. flaviscutellata	French Guiana	Cayenne	Nancibo	4.68032	-52.4815	1	Fouque et al. 2007
180	L. flaviscutellata	French Guiana	Cayenne	Regina	4.30086	-52.1354	1	Fouque et al. 2007
181	L. flaviscutellata	French Guiana	Cayenne	Sinnamary	5.37096	-52.9531	1	Fouque et al. 2007
182	L. flaviscutellata	French Guiana	Saint-Laurent du Maroni	Saül	3.61095	-53.1932	1	Fouque et al. 2007
183	L. flaviscutellata	Brazil	Amazonas	Humaitá	-7.68665	-62.492	1	Fraiha et al. 1978
184	L. flaviscutellata	Brazil	Pará	Anapu	-3.40449	-51.4219	1	Fraiha et al. 1978
185	L. flaviscutellata	Brazil	Pará	Brasil Novo	-3.43237	-52.6517	1	Fraiha et al. 1978
186	L. flaviscutellata	Brazil	Pará	Itaituba	-4.35161	-56.2394	1	Fraiha et al. 1978
187	L. flaviscutellata	Brazil	Pará	Rurópolis	-4.10249	-54.8432	1	Fraiha et al. 1978
565	L. flaviscutellata	Brazil	Pará	Itaituba	-4.34943	-56.1748	1	Fraiha et al. 1978
189	L. flaviscutellata	Peru	Loreto	Iquitos	-3.82499	-73.3636	1	Fraiha et al. 1980
190	L. flaviscutellata	Brazil	Amapá	Porto Grande	0.616286	-51.8896	1	Freitas et al. 2002
191	L. flaviscutellata	Brazil	Amapá	Porto Grande	0.676617	-51.5306	1	Freitas et al. 2002
192	L. flaviscutellata	Brazil	Amapá	Porto Grande	0.697452	-51.4597	1	Freitas et al. 2002
193	L. flaviscutellata	Bolivia	Pando		-11.0724	-68.771	1	Galati 2013
194	L. flaviscutellata	Colombia	Amazonas		-	-	dup 321	Galati 2013
196	L. flaviscutellata	Colombia	Casanare		-	-	dup 340	Galati 2013
197	L. flaviscutellata	Colombia	Chocó		-	-	dup 149	Galati 2013
198	L. flaviscutellata	Colombia	Guaviare		-	-	dup 70	Galati 2013
199	L. flaviscutellata	Colombia	Meta		-	-	dup 452	Galati 2013
200	L. flaviscutellata	Colombia	Norte de Santander		-	-	dup 473	Galati 2013
201	L. flaviscutellata	Colombia	Putumayo		-	-	dup 41	Galati 2013
202	L. flaviscutellata	Ecuador	Pichincha		-	-	dup 5	Galati 2013
203	L. flaviscutellata	Ecuador	Sucumbios		-	-	dup 469	Galati 2013
204	L. flaviscutellata	French Guiana			-	-	dup 322	Galati 2013
205	L. flaviscutellata	Peru	Loreto		-	-	dup 189	Galati 2013
206	L. flaviscutellata	Peru	Madre de Dios		-	-	dup 326	Galati 2013
207	L. flaviscutellata	Peru	San Martín		-	-	dup 45	Galati 2013
208	L. flaviscutellata	Peru	Ucayali		-	-	dup 513	Galati 2013
209	L. flaviscutellata	Venezuela	Amazonas		-	-	dup 353	Galati 2013
210	L. flaviscutellata	Venezuela	Anzoátegui		-	-	dup 246	Galati 2013
212	L. flaviscutellata	Venezuela	Bolivar		-	-	dup 245	Galati 2013
213	L. flaviscutellata	Brazil	Mato Grosso do Sul	Corumbá	-20.1452	-57.1437	1	Galati et al. 2006
214	L. flaviscutellata	Brazil	Pará	Juruti	-2.47581	-56.2127	1	Garcez et al. 2009
215	L. flaviscutellata	Brazil	Pará	Juruti	-2.50786	-56.1836	1	Garcez et al. 2009
216	L. flaviscutellata	Brazil	Rondônia	Buritis	-10.212	-63.829	1	Gil et al. 2003
217	L. flaviscutellata	Brazil	Rondônia	Cacaulândia	-10.34	-62.896	1	Gil et al. 2003
218	L. flaviscutellata	Brazil	Rondônia	Campo Novo de Rondônia	-10.598	-63.612	1	Gil et al. 2003
219	L. flaviscutellata	Brazil	Rondônia	Monte Negro	-	-	dup 448	Gil et al. 2003
220	L. flaviscutellata	Brazil	Rondônia	Costa Marques	-12.445	-64.227	1	Gil et al. 2009
221	L. flaviscutellata	Brazil	Rondônia	Espigão do Oeste	-11.525	-61.013	1	Gil et al. 2009
222	L. flaviscutellata	Brazil	Rondônia	Monte Negro	-	-	dup 448	Gil et al. 2009
223	L. flaviscutellata	Brazil	Rondônia	Nova Mamoré	-10.411	-65.331	1	Gil et al. 2009
224	L. flaviscutellata	Brazil	Rondônia	Nova União	-10.904	-62.561	1	Gil et al. 2009
225	L. flaviscutellata	Brazil	Rondônia	Porto Velho	-	-	dup 28	Gil et al. 2009
226	L. flaviscutellata	Brazil	Rondônia	Vale do Anari	-9.863	-62.186	1	Gil et al. 2009
227	L. flaviscutellata	Brazil	Rondônia	Vilhena	-12.741	-60.146	1	Gil et al. 2009
228	L. flaviscutellata	Brazil	São Paulo	Pariquera-Açu	-24.6124	-47.8915	1	Gomes & Galati 1987
229	L. flaviscutellata	Brazil	São Paulo	Cananéia	-24.9498	-47.9488	1	Gomes & Galati 1989
230	L. flaviscutellata	Brazil	São Paulo	Cananéia	-	-	dup 229	Gomes et al. 1990
231	L. flaviscutellata	Brazil	São Paulo	Cananéia	-	-	dup 229	Gomes et al. 1990
232	L. flaviscutellata	Brazil	Amazonas	Anamã	-3.42005	-61.516	1	Gomes et al. 2009
233	L. flaviscutellata	Brazil	Amazonas	Coari	-4.06271	-62.9363	1	Gomes et al. 2009
234	L. flaviscutellata	Brazil	Mato Grosso do Sul	Bataguassu	-21.7411	-52.2669	1	Gomes et al. 2012
235	L. flaviscutellata	Brazil	São Paulo	Presidente Epitácio	-21.5429	-51.9798	1	Gomes et al. 2012
236	L. flaviscutellata	Brazil	São Paulo	Presidente Epitácio	-21.5925	-51.9577	1	Gomes et al. 2012
237	L. flaviscutellata	Brazil	São Paulo	Presidente Epitácio	-21.6472	-52.0077	1	Gomes et al. 2012
238	L. flaviscutellata	Brazil	São Paulo	Presidente Epitácio	-21.6681	-51.9481	1	Gomes et al. 2012
239	L. flaviscutellata	Brazil	São Paulo	Presidente Epitácio	-21.7595	-52.0972	1	Gomes et al. 2012
240	L. flaviscutellata	Brazil	Amazonas	Manaus	-2.75895	-59.8515	1	Gomes et al. 2013
241	L. flaviscutellata	Brazil	Amazonas	Manaus	-3.02689	-59.8068	1	Gomes et al. 2013
242	L. flaviscutellata	Brazil	Amazonas	Manaus	-2.93226	-59.8096	1	Gomes et al. 2013
243	L. flaviscutellata	Brazil	Amazonas	Rio Preto da Eva	-2.75658	-59.7561	1	Gomes et al. 2013
244	L. flaviscutellata	Brazil	Amazonas	Rio Preto da Eva	-2.73343	-59.7971	1	Gomes et al. 2013
245	L. flaviscutellata	Venezuela	Bolivar		4.33209	-61.7375	1	Gonzales & Devera 1999
246	L. flaviscutellata	Venezuela	Anzoátegui		10.0698	-64.485	1	González et al. 1995
247	L. flaviscutellata	Brazil	Amazonas	Manaus	-	-	dup 40	Guerra et al. 2006
567	L. flaviscutellata	Brazil	Pará	Belém	-	-	dup 2	Hervé et al. 1984
248	L. flaviscutellata	Suriname	Para		-	-	dup 64	Hudson & Young 1985
249	L. flaviscutellata	Suriname	Sipaliwini		4.29167	-54.4083	1	Hudson & Young 1985
250	L. flaviscutellata	Suriname	Sipaliwini		4.59167	-55.8083	1	Hudson & Young 1985
251	L. flaviscutellata	Ecuador	Orellana	Coca City	-0.458333	-76.9917	1	Kato et al. 2013
252	L. flaviscutellata	Suriname	Brokopondo		5.02361	-54.9925	1	Kent et al. 2013
253	L. flaviscutellata	Suriname	Brokopondo		5.18056	-55.0797	1	Kent et al. 2013
254	L. flaviscutellata	Suriname	Brokopondo		5.01556	-55.1669	1	Kent et al. 2013
255	L. flaviscutellata	Suriname	Para		5.09389	-54.8278	1	Kent et al. 2013
256	L. flaviscutellata	Suriname	Para		-	-	dup 255	Kent et al. 2013
257	L. flaviscutellata	Suriname	Sipaliwini		5.09	-54.5331	1	Kent et al. 2013
258	L. flaviscutellata	Brazil	Pará	Belém	-1.4219	-48.427	1	Lainson & Shaw 1968
259	L. flaviscutellata	Brazil	Mato Grosso	Ribeirão Cascalheira	-12.8327	-51.7979	1	Lainson & Shaw 1969
260	L. flaviscutellata	Brazil	Pará	Almeirim	-0.780765	-52.6514	1	Lainson et al. 1979
263	L. flaviscutellata	Brazil	Pará	Ilha de Marajó	-0.89225	-48.6688	1	Lainson et al. 1983
261	L. flaviscutellata	Brazil	Pará	Parauapebas	-	-	dup 467	Lainson et al. 1992
262	L. flaviscutellata	Brazil	Pará	Parauapebas	-	-	dup 467	Lainson et al. 1992
264	L. flaviscutellata	Bolivia	La Paz		-14.5379	-67.7166	1	Le Pont & Desjeux 1986
265	L. flaviscutellata	French Guiana			4.75	-52.4167	1	Le Pont 1990
266	L. flaviscutellata	French Guiana	Cayenne	Caux	4.51528	-52.0578	1	Léger et al. 1977
267	L. flaviscutellata	French Guiana	Cayenne	Cayenne	-	-	dup 402	Léger et al. 1977
268	L. flaviscutellata	French Guiana	Cayenne	Saint-Georges	3.89926	-51.8148	1	Léger et al. 1977
269	L. flaviscutellata	French Guiana	Saint-Laurent du Maroni	Maripasoula	3.6481	-54.0398	1	Léger et al. 1977
270	L. flaviscutellata	French Guiana	Saint-Laurent du Maroni	Saül	-	-	dup 182	Léger et al. 1977
271	L. flaviscutellata	Brazil	Pará	Ananindeua	-	-	dup 538	Lewis 1975
272	L. flaviscutellata	Brazil	Pará	Itaituba	-4.42727	-56.2933	1	Lewis 1975
273	L. flaviscutellata	Brazil	Pará	Marabá	-	-	dup 418	Lewis 1975
274	L. flaviscutellata	Brazil	Pará	Parauapebas	-	-	dup 467	Lewis 1975
275	L. flaviscutellata	Trinidad and Tobago			-	-	dup 450	Lewis 1975
276	L. flaviscutellata	Brazil	Pará	Brasil Novo	-	-	dup 185	Lewis 1975
277	L. flaviscutellata	Peru	Loreto	Serafin Filomeno	-4.15	-72.942	1	Llanos 1973
289	L. flaviscutellata	Brazil	Tocantins	Palmas	-10.3098	-48.1558	1	Machado et al. 2012
290	L. flaviscutellata	Brazil	Mato Grosso	Brasnorte	-12.155	-57.979	1	Maciel & Missawa 2009
291	L. flaviscutellata	Brazil	Mato Grosso	Sapezal	-12.989	-58.764	1	Maciel & Missawa 2009
292	L. flaviscutellata	Brazil	Pará	Abaetetuba	-1.718	-48.883	1	Mangabeira 1942
293	L. flaviscutellata	Brazil	Pará	Ananindeua	-	-	dup 538	Mangabeira 1942
294	L. flaviscutellata	Brazil	Maranhão	São Luís	-2.59313	-44.3399	1	Marinho et al. 2008
295	L. flaviscutellata	Brazil	Maranhão	São Luís	-2.5668	-44.2497	1	Marinho et al. 2008
296	L. flaviscutellata	Brazil	Rio de Janeiro	Petrópolis	-22.5646	-43.229	1	Martins et al. 1962
297	L. flaviscutellata	Brazil	Roraima	Caracarai	-	-	dup 320	Martins et al. 1963
299	L. flaviscutellata	Brazil	Amazonas	Itacoatiara	-	-	dup 130	Martins et al. 1978
300	L. flaviscutellata	Brazil	Amazonas	Manaus	-	-	dup 68	Martins et al. 1978
302	L. flaviscutellata	Brazil	Distrito Federal	Brasília	-	-	dup 151	Martins et al. 1978
303	L. flaviscutellata	Brazil	Espírito Santo	Viana	-	-	dup 152	Martins et al. 1978
304	L. flaviscutellata	Brazil	Maranhão	Cururupu	-	-	dup 362	Martins et al. 1978
305	L. flaviscutellata	Brazil	Maranhão	Paço do Lumiar	-	-	dup 44	Martins et al. 1978
306	L. flaviscutellata	Brazil	Minas Gerais	Paracatu	-	-	dup 489	Martins et al. 1978
307	L. flaviscutellata	Brazil	Mato Grosso	Barra do Bugres	-15.073	-57.181	1	Martins et al. 1978
308	L. flaviscutellata	Brazil	Pará	Abaetetuba	-	-	dup 292	Martins et al. 1978
309	L. flaviscutellata	Brazil	Pará	Belém	-	-	dup 258	Martins et al. 1978
310	L. flaviscutellata	Brazil	Pará	Irituia	-	-	dup 133	Martins et al. 1978
311	L. flaviscutellata	Brazil	Pará	Marabá	-	-	dup 418	Martins et al. 1978
312	L. flaviscutellata	Brazil	Pará	Nova Timboteua	-	-	dup 135	Martins et al. 1978
313	L. flaviscutellata	Brazil	Pará	Peixe Boi	-	-	dup 136	Martins et al. 1978
314	L. flaviscutellata	Brazil	Pará	Santa Isabel do Pará	-	-	dup 137	Martins et al. 1978
315	L. flaviscutellata	Brazil	Pará	Santarém	-	-	dup 425	Martins et al. 1978
316	L. flaviscutellata	Brazil	Pará	São Miguel do Guamá	-	-	dup 139	Martins et al. 1978
317	L. flaviscutellata	Brazil	Rio de Janeiro	Nova Iguaçu	-	-	dup 154	Martins et al. 1978
318	L. flaviscutellata	Brazil	Rio de Janeiro	Petrópolis	-	-	dup 296	Martins et al. 1978
319	L. flaviscutellata	Brazil	Roraima	Boa Vista	-	-	dup 107	Martins et al. 1978
320	L. flaviscutellata	Brazil	Roraima	Caracaraí	1.816	-61.128	1	Martins et al. 1978
321	L. flaviscutellata	Colombia	Amazonas	Leticia	-4.20668	-69.9419	1	Martins et al. 1978
322	L. flaviscutellata	French Guiana	Cayenne	Baduel	4.92757	-52.2992	1	Martins et al. 1978
323	L. flaviscutellata	French Guiana	Cayenne	Cayenne	4.88011	-52.2614	1	Martins et al. 1978
324	L. flaviscutellata	French Guiana	Cayenne	Cayenne	-	-	dup 402	Martins et al. 1978
325	L. flaviscutellata	Peru	Loreto	Serafin Filomeno	-	-	dup 277	Martins et al. 1978
326	L. flaviscutellata	Peru	Madre de Dios	Iberia	-11.4147	-69.4911	1	Martins et al. 1978
327	L. flaviscutellata	Peru	Ucayali	Pucallpa	-	-	dup 513	Martins et al. 1978
328	L. flaviscutellata	Suriname	Brokopondo		-	-	dup 58	Martins et al. 1978
329	L. flaviscutellata	Trinidad and Tobago			-	-	dup 449	Martins et al. 1978
330	L. flaviscutellata	Trinidad and Tobago			-	-	dup 1	Martins et al. 1978
331	L. flaviscutellata	Trinidad and Tobago			-	-	dup 450	Martins et al. 1978
332	L. flaviscutellata	Trinidad and Tobago			-	-	dup 451	Martins et al. 1978
333	L. flaviscutellata	Venezuela	Amazonas	Nyiayobateri	-	-	dup 353	Martins et al. 1978
298	L. flaviscutellata	Brazil	Maranhão	Urbano Santos	-3.2414	-43.421	1	Martins et al. 2011
566	L. flaviscutellata	Brazil	Pará	Melgaço	-1.71942	-51.4587	1	Mascarenhas et al. 2009
278	L. flaviscutellata	Brazil	Tocantins	Palmeirópolis	-12.9246	-48.425	1	Mauricio Vilela, personal communication
279	L. flaviscutellata	Brazil	Tocantins	Palmeirópolis	-	-	dup 278	Mauricio Vilela, personal communication
280	L. flaviscutellata	Brazil	Tocantins	Paranã	-12.6667	-48.2408	1	Mauricio Vilela, personal communication
281	L. flaviscutellata	Brazil	Tocantins	Paranã	-	-	dup 280	Mauricio Vilela, personal communication
282	L. flaviscutellata	Brazil	Tocantins	Peixe	-12.2552	-48.3677	1	Mauricio Vilela, personal communication
283	L. flaviscutellata	Brazil	Tocantins	Peixe	-12.2584	-48.3432	1	Mauricio Vilela, personal communication
284	L. flaviscutellata	Brazil	Tocantins	Peixe	-	-	dup 282	Mauricio Vilela, personal communication
285	L. flaviscutellata	Brazil	Tocantins	São Salvador do Tocantins	-12.7541	-48.2804	1	Mauricio Vilela, personal communication
286	L. flaviscutellata	Brazil	Tocantins	São Salvador do Tocantins	-12.7368	-48.2442	1	Mauricio Vilela, personal communication
287	L. flaviscutellata	Brazil	Tocantins	Aragominas	-7.162	-48.528	1	Mauricio Vilela, personal communication
288	L. flaviscutellata	Brazil	Tocantins	Araguaína	-7.20694	-48.1578	1	Mauricio Vilela, personal communication
375	L. flaviscutellata	Brazil	Tocantins	Lajeado	-9.81	-48.4547	1	Mauricio Vilela, personal communication
376	L. flaviscutellata	Brazil	Tocantins	Lajeado	-9.81231	-48.3262	1	Mauricio Vilela, personal communication
377	L. flaviscutellata	Brazil	Tocantins	Palmas	-10.1249	-48.3615	1	Mauricio Vilela, personal communication
378	L. flaviscutellata	Brazil	Tocantins	Palmas	-10.2367	-48.3619	1	Mauricio Vilela, personal communication
379	L. flaviscutellata	Brazil	Tocantins	Porto Nacional	-10.0414	-48.4934	1	Mauricio Vilela, personal communication
380	L. flaviscutellata	Brazil	Tocantins	Porto Nacional	-10.0411	-48.493	1	Mauricio Vilela, personal communication
381	L. flaviscutellata	Brazil	Tocantins	Porto Nacional	-10.4188	-48.3741	1	Mauricio Vilela, personal communication
382	L. flaviscutellata	Brazil	Tocantins	Porto Nacional	-10.4186	-48.3724	1	Mauricio Vilela, personal communication
383	L. flaviscutellata	Brazil	Tocantins	Paranã	-12.5198	-48.2143	1	Mauricio Vilela, personal communication
384	L. flaviscutellata	Brazil	Tocantins	Paranã	-12.3115	-48.2619	1	Mauricio Vilela, personal communication
385	L. flaviscutellata	Brazil	Tocantins	Peixe	-12.2444	-48.3983	1	Mauricio Vilela, personal communication
386	L. flaviscutellata	Brazil	Tocantins	Peixe	-12.0349	-48.5461	1	Mauricio Vilela, personal communication
387	L. flaviscutellata	Brazil	Tocantins	São Valério	-11.9806	-48.2336	1	Mauricio Vilela, personal communication
337	L. flaviscutellata	Brazil	Mato Grosso	Várzea Grande	-15.6703	-56.1791	1	Missawa & Dias 2007
338	L. flaviscutellata	Brazil	Mato Grosso	Várzea Grande	-15.6769	-56.185	1	Missawa & Dias 2007
339	L. flaviscutellata	Brazil	Mato Grosso	Várzea Grande	-15.6651	-56.1943	1	Missawa & Dias 2007
340	L. flaviscutellata	Colombia	Casanare	Tauramena	4.99842	-72.711	1	Molina et al. 2008
341	L. flaviscutellata	Brazil	Mato Grosso do Sul	Bonito	-21.1139	-56.5157	1	Nunes et al. 2008
342	L. flaviscutellata	Brazil	Mato Grosso do Sul	Bonito	-21.1366	-56.4938	1	Nunes et al. 2008
343	L. flaviscutellata	Brazil	Mato Grosso do Sul	Campo Grande	-20.5264	-54.6292	1	Oliveira et al. 2003
344	L. flaviscutellata	Brazil	Mato Grosso do Sul	Campo Grande	-20.4351	-54.6777	1	Oliveira et al. 2003
345	L. flaviscutellata	Brazil	Mato Grosso do Sul	Campo Grande	-	-	dup 343	Oliveira et al. 2006
346	L. flaviscutellata	Brazil	Mato Grosso do Sul	Campo Grande	-	-	dup 344	Oliveira et al. 2006
347	L. flaviscutellata	Brazil	Pará	Barcarena	-1.53206	-48.6223	1	Oliveira et al. 2011
348	L. flaviscutellata	Brazil	Pará	Barcarena	-1.49111	-48.6192	1	Oliveira et al. 2011
349	L. flaviscutellata	Brazil	Mato Grosso do Sul	Campo Grande	-	-	dup 344	Oliveira et al. 2012
352	L. flaviscutellata	Brazil	Acre	Rio Branco	-9.93062	-67.8632	1	Pereira 2013
353	L. flaviscutellata	Venezuela	Amazonas	Sierra Parima	2.77367	-64.2242	1	Pifano et al. 1973
354	L. flaviscutellata	Brazil	Espírito Santo	Cariacica	-20.2684	-40.4833	1	Pinto et al. 2010
355	L. flaviscutellata	Brazil	Mato Grosso	Barra do Garças	-15.89	-52.257	1	Queiroz et al. 2012
124	L. flaviscutellata	Peru	Cusco	La Convención	-12.6796	-73.3301	1	Rado Covarrubias 2011
573	L. flaviscutellata	Brazil	Amazonas	Presidente Figueiredo	-1.82627	-60.365	1	Ramos et al. 2014
356	L. flaviscutellata	Brazil	Pará	Almeirim	-	-	dup 260	Ready et al. 1983
357	L. flaviscutellata	Brazil	Pará	Almeirim	-	-	dup 260	Ready et al. 1986
358	L. flaviscutellata	Brazil	Pará	Ipixuna do Pará	-2.50345	-47.7483	1	Rebelo & Oliveira-Pereira 2001
359	L. flaviscutellata	Brazil	Pará	Ipixuna do Pará	-	-	dup 358	Rebelo & Oliveira-Pereira 2001
360	L. flaviscutellata	Brazil	Pará	Paragominas	-3.16838	-48.0804	1	Rebelo & Oliveira-Pereira 2001
361	L. flaviscutellata	Brazil	Pará	Paragominas	-	-	dup 360	Rebelo & Oliveira-Pereira 2001
362	L. flaviscutellata	Brazil	Maranhão	Cururupu	-1.828	-44.868	1	Rebelo et al. 1996
363	L. flaviscutellata	Brazil	Maranhão	Vários	-2.53	-44.303	1	Rebelo et al. 1996
364	L. flaviscutellata	Brazil	Maranhão	Vários	-	-	dup 363	Rebelo et al. 1999
365	L. flaviscutellata	Brazil	Maranhão	Barreirinhas	-2.747	-42.826	1	Rebelo et al. 2010
366	L. flaviscutellata	Brazil	Maranhão	Barreirinhas	-	-	dup 365	Rebelo et al. 2010
367	L. flaviscutellata	Brazil	Maranhão	Barreirinhas	-	-	dup 365	Rebelo et al. 2010
368	L. flaviscutellata	Brazil	Maranhão	Barreirinhas	-	-	dup 365	Rebelo et al. 2010
369	L. flaviscutellata	Brazil	Maranhão	Barreirinhas	-	-	dup 365	Rebelo et al. 2010
370	L. flaviscutellata	Brazil	Maranhão	Barreirinhas	-	-	dup 365	Rebelo et al. 2010
371	L. flaviscutellata	Brazil	Maranhão	Barreirinhas	-	-	dup 365	Rebelo et al. 2010
372	L. flaviscutellata	Brazil	Maranhão	Barreirinhas	-	-	dup 365	Rebelo et al. 2010
373	L. flaviscutellata	Brazil	Maranhão	Barreirinhas	-	-	dup 365	Rebelo et al. 2010
374	L. flaviscutellata	Brazil	Amazonas	Manaus	-3.00756	-59.9589	1	Reis et al. 2013
388	L. flaviscutellata	Brazil	Mato Grosso	Aripuanã	-10.167	-59.459	1	Ribeiro et al. 2007
389	L. flaviscutellata	Brazil	Mato Grosso	Comodoro	-13.663	-59.786	1	Ribeiro et al. 2007
390	L. flaviscutellata	Brazil	Mato Grosso	Cuiabá	-15.596	-56.097	1	Ribeiro et al. 2007
391	L. flaviscutellata	Brazil	Mato Grosso	Feliz Natal	-12.386	-54.92	1	Ribeiro et al. 2007
392	L. flaviscutellata	Brazil	Mato Grosso	Gaucha do Norte	-13.242	-53.08	1	Ribeiro et al. 2007
393	L. flaviscutellata	Brazil	Mato Grosso	Marcelândia	-11.133	-54.597	1	Ribeiro et al. 2007
394	L. flaviscutellata	Brazil	Mato Grosso	Matupá	-10.057	-54.933	1	Ribeiro et al. 2007
395	L. flaviscutellata	Brazil	Mato Grosso	Nobres	-14.72	-56.328	1	Ribeiro et al. 2007
396	L. flaviscutellata	Brazil	Mato Grosso	Nova Lacerda	-14.476	-59.609	1	Ribeiro et al. 2007
397	L. flaviscutellata	Brazil	Mato Grosso	Pontes e Lacerda	-15.226	-59.335	1	Ribeiro et al. 2007
398	L. flaviscutellata	Brazil	Mato Grosso	Poxoréo	-15.837	-54.389	1	Ribeiro et al. 2007
399	L. flaviscutellata	Brazil	Mato Grosso	São Félix do Araguaia	-11.617	-50.669	1	Ribeiro et al. 2007
400	L. flaviscutellata	Brazil	Amazonas	Manaus	-3.09659	-59.965	1	Rocha et al. 2013
401	L. flaviscutellata	Brazil	Minas Gerais	Uberlândia	-18.9093	-48.2299	1	Rodrigues et al. 2011
402	L. flaviscutellata	French Guiana	Cayenne	Paracou	5.04167	-53.0083	1	Rotureau et al. 2006
403	L. flaviscutellata	French Guiana	Cayenne	Patawa District	4.91265	-52.325	1	Rotureau et al. 2006
404	L. flaviscutellata	French Guiana	Cayenne	Petit-Saut	5.09167	-53.0917	1	Rotureau et al. 2006
405	L. flaviscutellata	French Guiana	Cayenne	Rococoua	5.425	-53.3417	1	Rotureau et al. 2006
406	L. flaviscutellata	French Guiana	Saint-Laurent du Maroni	Angoulême	5.34167	-53.675	1	Rotureau et al. 2006
407	L. flaviscutellata	Brazil	Pará	Abaetetuba	-	-	dup 292	Ryan 1986
408	L. flaviscutellata	Brazil	Pará	Almeirim	-	-	dup 260	Ryan 1986
409	L. flaviscutellata	Brazil	Pará	Altamira	-	-	dup 276	Ryan 1986
410	L. flaviscutellata	Brazil	Pará	Altamira	-	-	dup 276	Ryan 1986
411	L. flaviscutellata	Brazil	Pará	Anapu	-	-	dup 184	Ryan 1986
412	L. flaviscutellata	Brazil	Pará	Belém	-	-	dup 258	Ryan 1986
413	L. flaviscutellata	Brazil	Pará	Belém	-	-	dup 258	Ryan 1986
414	L. flaviscutellata	Brazil	Pará	Belém	-	-	dup 258	Ryan 1986
415	L. flaviscutellata	Brazil	Pará	Irituia	-	-	dup 133	Ryan 1986
416	L. flaviscutellata	Brazil	Pará	Itaituba	-	-	dup 186	Ryan 1986
417	L. flaviscutellata	Brazil	Pará	Jacareacanga	-6.224	-57.754	1	Ryan 1986
418	L. flaviscutellata	Brazil	Pará	Marabá	-5.369	-49.118	1	Ryan 1986
419	L. flaviscutellata	Brazil	Pará	Nova Timboteua	-	-	dup 135	Ryan 1986
420	L. flaviscutellata	Brazil	Pará	Oriximiná	-1.08104	-57.0362	1	Ryan 1986
421	L. flaviscutellata	Brazil	Pará	Parauapebas	-	-	dup 467	Ryan 1986
422	L. flaviscutellata	Brazil	Pará	Peixe Boi	-	-	dup 136	Ryan 1986
423	L. flaviscutellata	Brazil	Pará	Rurópolis	-	-	dup 187	Ryan 1986
424	L. flaviscutellata	Brazil	Pará	Santa Isabel do Pará	-	-	dup 137	Ryan 1986
425	L. flaviscutellata	Brazil	Pará	Santarém	-2.443	-54.708	1	Ryan 1986
426	L. flaviscutellata	Brazil	Pará	São Miguel do Guamá	-	-	dup 139	Ryan 1986
427	L. flaviscutellata	Brazil	Pará	Tucuruí	-3.768	-49.673	1	Ryan 1986
428	L. flaviscutellata	Brazil	Pará	Tucuruí	-	-	dup 427	Ryan 1986
429	L. flaviscutellata	Brazil	Pará	Belém	-	-	dup 258	Ryan et al. 1987
430	L. flaviscutellata	Brazil	Pará	Oriximiná	-1.34167	-56.0083	1	Ryan et al. 1987
431	L. flaviscutellata	Brazil	Pará	Paragominas	-2.995	-47.353	1	Ryan et al. 1987
432	L. flaviscutellata	Brazil	Pará	Parauapebas	-	-	dup 467	Ryan et al. 1987
433	L. flaviscutellata	Brazil	Pará	Tucuruí	-	-	dup 427	Ryan et al. 1987
434	L. flaviscutellata	Brazil	Distrito Federal	Brasília	-16.0036	-48.0822	1	Sampaio et al. 2009
475	L. flaviscutellata	Brazil	Amazonas	Manaus	-	-	dup 40	Sand fly collection - CPqRR
476	L. flaviscutellata	Brazil	Amazonas	Manaus	-2.98021	-60.0879	1	Sand fly collection - CPqRR
477	L. flaviscutellata	Brazil	Amazonas	Novo Aripuanã	-5.14616	-60.3541	1	Sand fly collection - CPqRR
478	L. flaviscutellata	Brazil	Amazonas	Rio Preto da Eva	-2.6279	-59.6071	1	Sand fly collection - CPqRR
479	L. flaviscutellata	Brazil	Amazonas	Tefé	-3.36509	-64.7007	1	Sand fly collection - CPqRR
480	L. flaviscutellata	Brazil	Amazonas	Manaus	-	-	dup 68	Sand fly collection - CPqRR
481	L. flaviscutellata	Brazil	Amapá	Macapá	-	-	dup 57	Sand fly collection - CPqRR
482	L. flaviscutellata	Brazil	Amapá	Pedra Branca do Amapari	0.761788	-51.9628	1	Sand fly collection - CPqRR
483	L. flaviscutellata	Brazil	Bahia	Ubaíra	-13.2683	-39.6704	1	Sand fly collection - CPqRR
484	L. flaviscutellata	Brazil	Distrito Federal	Brasília	-	-	dup 151	Sand fly collection - CPqRR
485	L. flaviscutellata	Brazil	Espírito Santo	Cariacica	-	-	dup 354	Sand fly collection - CPqRR
486	L. flaviscutellata	Brazil	Espírito Santo	Viana	-	-	dup 152	Sand fly collection - CPqRR
487	L. flaviscutellata	Brazil	Maranhão	Cururupu	-	-	dup 362	Sand fly collection - CPqRR
488	L. flaviscutellata	Brazil	Maranhão	Paço do Lumiar	-	-	dup 44	Sand fly collection - CPqRR
489	L. flaviscutellata	Brazil	Minas Gerais	Paracatu	-17.4888	-46.5644	1	Sand fly collection - CPqRR
490	L. flaviscutellata	Brazil	Mato Grosso	Barra do Bugres	-	-	dup 307	Sand fly collection - CPqRR
491	L. flaviscutellata	Brazil	Mato Grosso	Denise	-14.8181	-56.8395	1	Sand fly collection - CPqRR
492	L. flaviscutellata	Brazil	Mato Grosso	Sorriso	-12.575	-55.7836	1	Sand fly collection - CPqRR
493	L. flaviscutellata	Brazil	Pará	Belém	-1.44602	-48.4282	1	Sand fly collection - CPqRR
494	L. flaviscutellata	Brazil	Pará	Belém	-	-	dup 258	Sand fly collection - CPqRR
495	L. flaviscutellata	Brazil	Pará	Capitão Poço	-1.77009	-47.062	1	Sand fly collection - CPqRR
496	L. flaviscutellata	Brazil	Pará	Ipixuna do Pará	-2.558	-47.494	1	Sand fly collection - CPqRR
497	L. flaviscutellata	Brazil	Pará	Paragominas	-	-	dup 431	Sand fly collection - CPqRR
498	L. flaviscutellata	Brazil	Pará	Ulianópolis	-3.756	-47.501	1	Sand fly collection - CPqRR
499	L. flaviscutellata	Brazil	Rio de Janeiro	Nova Iguaçu	-	-	dup 154	Sand fly collection - CPqRR
500	L. flaviscutellata	Brazil	Rio de Janeiro	Petrópolis	-	-	dup 296	Sand fly collection - CPqRR
501	L. flaviscutellata	Brazil	Rondônia	Guarajá-Mirim	-10.8523	-65.2028	1	Sand fly collection - CPqRR
502	L. flaviscutellata	Brazil	Rondônia	Ji-Paraná	-10.8397	-61.915	1	Sand fly collection - CPqRR
503	L. flaviscutellata	Brazil	Roraima	Boa Vista	-	-	dup 319	Sand fly collection - CPqRR
504	L. flaviscutellata	Brazil	Roraima	Cantá	2.85651	-60.56	1	Sand fly collection - CPqRR
505	L. flaviscutellata	Brazil	Roraima	Caracarai	-	-	dup 320	Sand fly collection - CPqRR
506	L. flaviscutellata	Brazil	Roraima	Caracaraí	1.9631	-61.0214	1	Sand fly collection - CPqRR
507	L. flaviscutellata	Brazil	Roraima	Mucajaí	2.4697	-60.9025	1	Sand fly collection - CPqRR
508	L. flaviscutellata	Brazil	Tocantins	Monte do Carmo	-	-	dup 17	Sand fly collection - CPqRR
509	L. flaviscutellata	Brazil	Tocantins	Porto Nacional	-	-	dup 18	Sand fly collection - CPqRR
510	L. flaviscutellata	Brazil	Tocantins	Porto Nacional	-	-	dup 18	Sand fly collection - CPqRR
511	L. flaviscutellata	Peru	Madre de Dios	Iberia	-10.9429	-69.5818	1	Sand fly collection - CPqRR
512	L. flaviscutellata	Peru	Madre de Dios	Iberia	-	-	dup 326	Sand fly collection - CPqRR
513	L. flaviscutellata	Peru	Ucayali	Pucallpa	-8.36318	-74.584	1	Sand fly collection - CPqRR
514	L. flaviscutellata	Peru	Ucayali	Pucallpa	-	-	dup 513	Sand fly collection - CPqRR
515	L. flaviscutellata	Peru	Ucayali	Pucallpa	-8.34197	-74.5945	1	Sand fly collection - CPqRR
516	L. flaviscutellata	Brazil	Amazonas	Manaus	-3.14906	-60.0079	1	Sand fly collection - Forattini
517	L. flaviscutellata	Brazil	Pará	Belém	-	-	dup 258	Sand fly collection - Forattini
518	L. flaviscutellata	Brazil	Pará	Bom Jesus do Tocantins	-5.01753	-48.5418	1	Sand fly collection - Forattini
519	L. flaviscutellata	Brazil	São Paulo	Cananéia	-	-	dup 229	Sand fly collection - Forattini
532	L. flaviscutellata	Brazil	Amapá	Serra do Navio	0.903507	-52.005	1	Sand fly collection - IEC
533	L. flaviscutellata	Brazil	Pará	Abaetetuba	-	-	dup 292	Sand fly collection - IEC
534	L. flaviscutellata	Brazil	Pará	Almeirim	-	-	dup 260	Sand fly collection - IEC
535	L. flaviscutellata	Brazil	Pará	Almeirim	-	-	dup 260	Sand fly collection - IEC
536	L. flaviscutellata	Brazil	Pará	Almeirim	-	-	dup 260	Sand fly collection - IEC
537	L. flaviscutellata	Brazil	Pará	Brasil Novo	-	-	dup 185	Sand fly collection - IEC
538	L. flaviscutellata	Brazil	Pará	Ananindeua	-1.41247	-48.3669	1	Sand fly collection - IEC
539	L. flaviscutellata	Brazil	Pará	Augusto Correa	-1.02195	-46.6454	1	Sand fly collection - IEC
540	L. flaviscutellata	Brazil	Pará	Barcarena	-	-	dup 347	Sand fly collection - IEC
541	L. flaviscutellata	Brazil	Pará	Belém	-	-	dup 258	Sand fly collection - IEC
542	L. flaviscutellata	Brazil	Pará	Belém	-	-	dup 258	Sand fly collection - IEC
543	L. flaviscutellata	Brazil	Pará	Belém	-	-	dup 258	Sand fly collection - IEC
544	L. flaviscutellata	Brazil	Pará	Belém	-	-	dup 2	Sand fly collection - IEC
545	L. flaviscutellata	Brazil	Pará	Belém	-1.43037	-48.4565	1	Sand fly collection - IEC
546	L. flaviscutellata	Brazil	Pará	Benevides	-1.31749	-48.2413	1	Sand fly collection - IEC
547	L. flaviscutellata	Brazil	Pará	Bragança	-	-	dup 549	Sand fly collection - IEC
548	L. flaviscutellata	Brazil	Pará	Bragança	-	-	dup 549	Sand fly collection - IEC
549	L. flaviscutellata	Brazil	Pará	Bragança	-1.1049	-46.7247	1	Sand fly collection - IEC
550	L. flaviscutellata	Brazil	Pará	Igarapé Miri	-1.97742	-48.9574	1	Sand fly collection - IEC
551	L. flaviscutellata	Brazil	Pará	Itaituba	-	-	dup 565	Sand fly collection - IEC
552	L. flaviscutellata	Brazil	Pará	Marituba	-1.43659	-48.337	1	Sand fly collection - IEC
553	L. flaviscutellata	Brazil	Pará	Moju	-1.89824	-48.7645	1	Sand fly collection - IEC
554	L. flaviscutellata	Brazil	Pará	Oriximiná	-	-	dup 420	Sand fly collection - IEC
555	L. flaviscutellata	Brazil	Pará	Parauapebas	-	-	dup 467	Sand fly collection - IEC
556	L. flaviscutellata	Brazil	Pará	Parauapebas	-	-	dup 467	Sand fly collection - IEC
557	L. flaviscutellata	Brazil	Pará	Rurópolis	-	-	dup 187	Sand fly collection - IEC
558	L. flaviscutellata	Brazil	Pará	Salvaterra	-	-	dup 101	Sand fly collection - IEC
559	L. flaviscutellata	Brazil	Pará	Salvaterra	-	-	dup 101	Sand fly collection - IEC
560	L. flaviscutellata	Brazil	Pará	Salvaterra	-	-	dup 101	Sand fly collection - IEC
561	L. flaviscutellata	Brazil	Pará	Salvaterra	-	-	dup 101	Sand fly collection - IEC
563	L. flaviscutellata	Brazil	Amazonas	Humaitá	-	-	dup 183	Sand fly collection - IEC
564	L. flaviscutellata	Brazil	Rondônia	Vale do Anari	-	-	dup 226	Sand fly collection - IEC
520	L. flaviscutellata	Brazil	Pará	Belém	-	-	dup 258	Sand fly collection - MZUSP
521	L. flaviscutellata	Brazil	Pará	Ananindeua	-	-	dup 538	Sand fly collection - MZUSP
522	L. flaviscutellata	Brazil	Pará	Belém	-	-	dup 545	Sand fly collection - MZUSP
523	L. flaviscutellata	French Guiana	Cayenne	Baduel	-	-	dup 322	Sand fly collection - MZUSP
524	L. flaviscutellata	Brazil	Bahia	Salvador	-12.994	-38.4892	1	Sand fly collection - Sherlock
435	L. flaviscutellata	Brazil	Pará	Belém	-	-	dup 258	Shaw & Lainson 1968
436	L. flaviscutellata	Brazil	Pará	Belém	-	-	dup 2	Shaw & Lainson 1972
437	L. flaviscutellata	Brazil	Pará	Belém	-	-	dup 258	Shaw & Lainson 1972
438	L. flaviscutellata	Brazil	Pará	Belém	-	-	dup 2	Shaw et al. 1972
439	L. flaviscutellata	Brazil	Pará	Belém	-	-	dup 258	Shaw et al. 1972
440	L. flaviscutellata	Brazil	Pará	Belém	-	-	dup 258	Shaw et al. 1972
441	L. flaviscutellata	Brazil	Amazonas	Manacapuru	-3.19546	-60.5753	1	Silva et al. 2007
442	L. flaviscutellata	Brazil	Amazonas	Manacapuru	-3.26813	-60.5478	1	Silva et al. 2007
443	L. flaviscutellata	Brazil	Amazonas	Manacapuru	-3.2225	-60.4503	1	Silva et al. 2007
444	L. flaviscutellata	Brazil	Amazonas	Manaus	-2.59065	-60.0305	1	Silva et al. 2010a
445	L. flaviscutellata	Brazil	Maranhão	Chapadinha	-3.72073	-43.478	1	Silva et al. 2010b
446	L. flaviscutellata	Brazil	Maranhão	Chapadinha	-3.73959	-43.3271	1	Silva et al. 2010b
447	L. flaviscutellata	Brazil	Pará	Parauapebas	-6.06234	-50.0593	1	Souza et al. 2010
448	L. flaviscutellata	Brazil	Rondônia	Monte Negro	-10.295	-63.324	1	Teles et al. 2013
120	L. flaviscutellata	Brazil	Pará	Almeirim	-0.871311	-52.5355	1	Thiago Vasconcelos, personal communication
121	L. flaviscutellata	Brazil	Pará	Ipixuna do Pará	-	-	dup 496	Thiago Vasconcelos, personal communication
122	L. flaviscutellata	Brazil	Pará	Irituia	-	-	dup 133	Thiago Vasconcelos, personal communication
123	L. flaviscutellata	Brazil	Pará	Ulianópolis	-	-	dup 498	Thiago Vasconcelos, personal communication
125	L. flaviscutellata	Brazil	Pará	Altamira	-3.17914	-52.208	1	Thiago Vasconcelos, personal communication
126	L. flaviscutellata	Brazil	Pará	Anapu	-3.12067	-51.693	1	Thiago Vasconcelos, personal communication
127	L. flaviscutellata	Brazil	Pará	Senador José Porfírio	-3.51272	-51.8985	1	Thiago Vasconcelos, personal communication
128	L. flaviscutellata	Brazil	Pará	Senador José Porfírio	-3.56428	-51.9263	1	Thiago Vasconcelos, personal communication
129	L. flaviscutellata	Brazil	Pará	Vitória do Xingu	-3.12911	-51.6991	1	Thiago Vasconcelos, personal communication
188	L. flaviscutellata	Brazil	Pará	Juruti	-	-	dup 214	Thiago Vasconcelos, personal communication
334	L. flaviscutellata	Brazil	Pará	Dom Elizeu	-4.285	-47.505	1	Thiago Vasconcelos, personal communication
335	L. flaviscutellata	Brazil	Pará	Peixe Boi	-	-	dup 136	Thiago Vasconcelos, personal communication
336	L. flaviscutellata	Brazil	Pará	São Miguel do Guamá	-	-	dup 139	Thiago Vasconcelos, personal communication
449	L. flaviscutellata	Trinidad and Tobago			10.6073	-61.1855	1	Tikasingh 1975
450	L. flaviscutellata	Trinidad and Tobago			10.5956	-61.1449	1	Tikasingh 1975
451	L. flaviscutellata	Trinidad and Tobago			10.6015	-61.0955	1	Tikasingh 1975
452	L. flaviscutellata	Colombia	Meta	Villavalencio	4.0791	-73.4541	1	Trujillo et al. 2013
453	L. flaviscutellata	Brazil	Bahia	Cravolândia/Ubaíra/Wenceslau Guimarães	-13.5114	-39.7031	1	Vexenat et al. 1986
454	L. flaviscutellata	Brazil	Tocantins	Porto Nacional	-10.7253	-48.3933	1	Vilela et al. 2011
455	L. flaviscutellata	Brazil	Tocantins	Porto Nacional	-10.7507	-48.4691	1	Vilela et al. 2011
456	L. flaviscutellata	Brazil	Tocantins	Guaraí	-8.66328	-48.3989	1	Vilela et al. 2013
457	L. flaviscutellata	Brazil	Tocantins	Guaraí	-	-	dup 456	Vilela et al. 2013
458	L. flaviscutellata	Brazil	Tocantins	Guaraí	-	-	dup 456	Vilela et al. 2013
459	L. flaviscutellata	Brazil	Tocantins	Guaraí	-8.66036	-48.4164	1	Vilela et al. 2013
460	L. flaviscutellata	Brazil	Tocantins	Guaraí	-	-	dup 459	Vilela et al. 2013
461	L. flaviscutellata	Brazil	Tocantins	Guaraí	-8.82889	-48.5149	1	Vilela et al. 2013
462	L. flaviscutellata	Brazil	Tocantins	Guaraí	-	-	dup 461	Vilela et al. 2013
463	L. flaviscutellata	Brazil	Tocantins	Guaraí	-8.82356	-48.5069	1	Vilela et al. 2013
464	L. flaviscutellata	Brazil	Tocantins	Guaraí	-	-	dup 463	Vilela et al. 2013
465	L. flaviscutellata	Colombia	Vichada	Cumaribo	4.48886	-69.7917	1	Vivero et al. 2010
466	L. flaviscutellata	Brazil	Pará	Belém	-	-	dup 2	Ward 1976
467	L. flaviscutellata	Brazil	Pará	Parauapebas	-6.00833	-50.3083	1	Ward et al. 1973
468	L. flaviscutellata	Suriname	Brokopondo		-	-	dup 58	Wijers & Linger 1966
469	L. flaviscutellata	Ecuador	Napo (Atual Sucumbíos)		-0.408333	-76.5083	1	Young & Rogers 1984
470	L. flaviscutellata	Brazil	Pará	Altamira	-	-	dup 276	Young 1979
471	L. flaviscutellata	Brazil	Pará	Belém	-	-	dup 258	Young 1979
472	L. flaviscutellata	Brazil	Pará	Itaituba	-	-	dup 416	Young 1979
474	L. flaviscutellata	Peru	Madre de Dios		-12.8417	-69.3417	1	Young et al. 1985

## Sheet: References
ref	comp_ref
Aitken et al. 1968	Aitken THG, Worth CB, Tikasingh ES. Arbovirus studies in Bush Bush Forest, Trinidad, W. I., September 1959-December 1964. III. Entomologic Studies. Amer J Trop Med Hyg. 1968; 17(2): 253-268.
Aitken et al. 1975	Aitken THG, Woodall JP, de Andrade AHP, Bensabath G, Shope RE. Pacui virus, phlebotomine flies and small mammals in Brazil: An epidemiological study. Amer J Trop Med Hyg. 1975; 24: 358-368.
Alencar et al. 2011	Alencar RB, Queiroz RG, Barrett TV. Breeding sites of phlebotomine sand flies (Diptera: Psychodidae) and efficiency of extraction techniques for immature stages in terra-firme forest in Amazonas State, Brazil. Acta Trop. 2011; 118: 204-208.
Alexander et al. 1992	Alexander JB, Takaoka H, Eshita Y, Gomez EA, Hashiguchi Y. New records of phlebotomine sand flies (Diptera: Psycodidae) from Ecuador. Mem Inst Oswaldo Cruz. 1992; 87: 123-130.
Almeida et al. 2013	Almeida PS, Leite JA, Araújo AD, Batista PM, Touro RBS, Araújo VS, et al. Fauna of phlebotomine sand flies (Diptera, Psychodidae) in areas with endemic American cutaneous leishmaniasis in the State of Mato Grosso do Sul, Brazil. Rev Bras Entomol. 2013; 57(1): 105-112.
Alves et al. 2011	Alves VR, Freitas RA, Santos FL, Barrett TV. Diversity of sandflies (Psychodidae: Phlebotominae) captured in sandstone caves from Central Amazonia, Brazil. Mem Inst Oswaldo Cruz. 2011; 106(3): 353-359.
Alves et al. 2012	Alves VR, Freitas RA, Santos FL, Oliveira AFJ, Barrett TV, Shimabukuro PHF. Sand Flies (Diptera, Psychodidae, Phlebotominae) from Central Amazonia and four new records for the Amazonas state, Brazil. Rev Bras Entomol. 2012; 56(2): 220-227.
Andrade et al. 2009	Andrade ARO, Nunes VLB, Galati EAB, Arruda CCP, Santos MFC, Rocca MEG, et al. Epidemiological study on leishmaniasis in na area of environmental tourism and ecotourism, State of Mato Grosso do Sul, 2006-2007. Rev Soc Bras Med Trop. 2009; 42(5): 488-493.
Andrade Filho et al. 2001	Andrade Filho JD, Valente MB, Andrade W, Brazil RP, Falcao AL. Flebotomíneos do estado de Tocantins, Brasil (Diptera, Psychodidae). Rev Soc Bras Med Trop. 2001; 34(4): 323-339.
Araujo-Filho et al. 1981	Araujo-Filho NA, Sherlock IA, Coura JR. Leishmaniose Tegumentar Americana na Ilha Grande, Rio de Janeiro. V. Observações sobre a Biologia dos Transmissores em Condições Naturais. Rev Soc Bras Med Trop. 1981; 15(4-6): 171-183.
Arias & Freitas 1977	Arias JR, Freitas RA. Flebótomos da Amazónia Central. 1. Resultados obtidos das capturas feitas com iscas humana e equina (Diptera, Psychodidae). Acta Amaz. 1977; 7: 507-527.
Arias & Freitas 1978	Arias JR, Freitas RA. Sôbre os vectores de leishmaniose cutânea na Amazónia central do Brasil. 2. Incidencia de flagelados em flebótomos selvaticos. Acta Amaz. 1978; 8: 387-396.
Arias & Freitas 1982a	Arias JR, Freitas RA. The known geographical distribution of sand flies in the State of Acre, Brasil (Diptera: Psychodidae). Acta Amaz. 1982; 12: 401-408.
Arias & Freitas 1982b	Arias JR, Freitas RA. On the vectors of cutaneous leishmaniasis in the Central Amazon of Brasil. 3. Phlebotomine sand fly stratification in a terra firme forest. Acta Amaz. 1982; 12(3): 599-608.
Arias et al. 1985	Arias JR, Miles MA, Naiff RD, Povoa MM, de Freitas RA, Biancardi CB, et al. Flagellate infections of Brazilian sandflies (Diptera: Psychodidae): Isolation in vitro and biochemical identifiction of Endotrypanum and Leishmania. Amer J Trop Med Hyg. 1985; 34(6): 1098-1108.
Ayres 2011	Ayres AR. Estudo da fauna de flebotomíneos (Diptera: Psychodidae) e frequência da infecção em Lutzomyia longipalpis por Leishmania infatum chagasi em área de transmissão de leishmanioses visceral e tegumentar no estado do Pará. M.Sc. Thesis, Universidade Federal do Pará. 2011.
Azevedo et al. 1993	Azevedo ACR, Bessa Luz SL, Vilela ML, Rangel EF. Studies on the sandfly fauna of Samuel Ecological Station, Porto Velho Municipality, Rondônia State, Brazil. Mem Inst Oswaldo Cruz. 1993; 88(4): 509-512.
Azevedo et al. 2002	Azevedo ACR, Souza NA, Meneses CRV, Costa WA, Costa SM, Lima JB, et al. Ecology of sand flies (Diptera: Psychodidae: Phlebotominae) in the North of the state of Mato Grosso, Brazil. Mem Inst Oswaldo Cruz. 2002; 97(4): 459-464.
Azevedo et al. 2008	Azevedo ACR, Costa SM, Pinto MCG, Souza JL, Cruz HC, Vidal J, et al. Studies on the sandfly fauna (Diptera: Psychodidae: Phlebotominae) from transmission areas of American Cutaneous Leishmaniasis in state of Acre, Brazil. Mem Inst Oswaldo Cruz. 2008; 103(8): 760-767.
Azevedo et al. 2011	Azevedo PCB, Lopes GN, Fonteles RS, Vasconcelos GC, Moraes JLP, Rebelo JMM. The effect of fragmentation on phlebotomine communities (Diptera: Psychodidae) in areas of ombrophilous forest in São Luis, State of Maranhão, Brazil. Neotrop Entomol. 2011; 40(2): 271-277.
Balbino et al. 2005a	Balbino VQ, Coutinho-Abreu IV, Sonoda IV. Phlebotomine sandflies (Diptera: Psychodidae) of the Atlantic forest in Recife, Pernambuco State, Brazil: the species coming to human bait, nd their seasonal and monthly variations over a 2-year period. Ann Trop Med Parasitol. 2005; 99(7): 683-693.
Balbino et al. 2005b	Balbino VQ, Andrade MS, Coutinho-Abreu I, Sonoda IV, Marcondes CB, Shaw JJ, et al. Sand flies (Diptera: Psychodidae) in Pernambuco State, northeastern Brazil: The presence of species incriminated as vectors of cutaneous leishmaniasis in the Amazon region. Zootaxa. 2005; 1078: 25-32.
Barbosa et al. 2008	Barbosa MGV, Fé NF, Marcião AHR, Silva APT, Monteiro WM, Guerra JAO. Fauna de flebotomíneos (Diptera: Psychodidae) em um foco de leishmaniose tegumentar americana na área periurbana de Manaus, Estado do Amazonas. Rev Soc Bras Med Trop. 2008; 41(5): 485-491.
Barreto et al. 2000	Barreto M, Burbano ME, Barreto P. Lutzomyia Sand Flies (Diptera: Psychodidae) from Middle and Lower Putumayo Department, Colombia, with New Records to the Country. Mem Inst Oswaldo Cruz. 2000; 95(5): 633-639.
Barrett et al. 1996	Barrett TV, Freitas RA, Albuquerque CMI, Guerrero JCH. Report on a Collection of Lutzomyia Sand Flies (Diptera: Psychodidae) from the Middle Solimões (Amazonas, Brazil). Mem Inst Oswaldo Cruz. 1996; 91(1): 27-35.
Barros et al. 2000	Barros VLL, Rebêlo JMM, Silva FS. Flebotomíneos (Diptera, Psychodidae) de capoeira do Município do Paço do Lumiar, Estado do Maranhão, Brasil. Área de transmissão de leishmaniose. Cad Saude Publica. 2000; 16(1): 265-270.
Beati et al. 2004	Beati L, Cáceres AG, Lee JA, Munstermann LE. Systematic relationships among Lutzomyia sand flies (Diptera: Psychodidae) of Peru and Colombia based on the analysis of 12S and 28S ribosomal DNA sequences. Int J Parasitol. 2004; 34: 225-234.
Bejarano 2006	Bejarano E. ELista actualizada de los psicódidos (Diptera: Psychodidae) de Colombia. Folia Entomol Mex. 2006; 45: 47-56.
Biancardi & Castellon 2000	Biancardi CAM, Castellón EG. Flebotomíneos (Diptera: Psychodidae) no Estado de Mato Grosso, município de Chapada dos Guimarães, Brasil. Acta Amaz. 2000; 30: 115-128.
Biancardi et al. 1982	Biancardi CB, Arias JR, Freitas RA, Castellon EG. The known geographical distribution of sand flies in the state of Rondônia, Brazil (Diptera, Psychodidae). Acta Amaz. 1982; 12: 167-179.
Brazil et al. 2000	Brazil RP, Andrade Filho JD, Falcão AL. Notes on the phlebotomine sand flies (Diptera: Psychodidae) from Amapá State, North Brazil. J Am Mosquito Control Assoc. 2000; 16: 40-41.
Brito et al. 2014	Brito VN, Almeida ABPF, Nakazato L, Duarte R, Souza CO, Sousa VRF. Phlebotomine fauna, natural infection rate and feeding habits of Lutzomyia cruzi in Jaciara, state of Mato Grosso, Brazil. Mem Inst Oswaldo Cruz. 2014; 109(7): 899-904.
Bruno M. Carvalho, personal communication	Bruno M. Carvalho, personal communication
Burgos & Hudson 1994	Burgos AM, Hudson JE. Annotated list of the Phlebotominae (Diptera) of Suriname. Mem Inst Oswaldo Cruz. 1994; 89(2): 171-178.
Cabanillas & Castellon 1999	Cabanillas MRS, Castellon EG. Distribution of Sandflies (Diptera: Psychodidae) on Tree-trunks in a Non-flooded Area of the Ducke Forest Reserve, Manaus, AM, Brazil. Mem Inst Oswaldo Cruz. 1999; 94(3): 289-296.
Cabanillas et al. 2001	Cabanillas M, Braga J, Viena M. Flebotomíneos da floresta de terra firme da Amazônia Peruana (Diptera: Psychodidae). Acta Amaz. 2001; 31(2): 275-284.
Cabrera et al. 2009	Cabrera OL, Mosquera L, Santamaría E, Ferro C. Flebótomos (Diptera: Psychodidae) del departamento de Guaviare, Colombia, com nuevos registros para el país. Biomedica. 2009; 29: 73-86.
Campos et al. 2013	Campos A, Matavelli R, dos Santos CLC, Moraes LS, Rebelo JMM. Ecology of Phlebotomines (Diptera: Psychodidae) in a Transitional Area Between the Amazon and the Cerrado in the State of Maranhão, Brazil. J Med Ent. 2013; 50(1): 52-58.
Carvalho et al. 2013	Carvalho BM, Maximo M, Costa WA, Santana ALF, Costa SM, Rego TANC, et al. Leishmaniasis transmission in an ecotourism area: potential vectors in Ilha Grande, Rio de Janeiro State, Brazil. Parasit Vect. 2013; 2013(6): 325.
Carvalho et al. 2000	Carvalho ML, Rebêlo JMM, Araújo JAC, Barros VLL. Aspectos ecológicos dos flebotomíneos (Diptera, Psychodidae) do município de São José de Ribamar, Ilha de São Luís-MA, Brasil. Área Endêmica de leishmanioses. Entomol Vect. 2000; 7(1): 19-32.
Carvalho et al. 2010	Carvalho MSL, Bredt A, Meneghin ER, Oliveira C. Flebotomíneos (Diptera: Psychodidae) em áreas de ocorrência de leishmaniose tegumentar americana no Distrito Federal, Brasil, 2006 a 2008. Epidemiol Serv Saude. 2010; 19(3): 227-237.
Castellón et al. 1991a	Castellón EG, Araújo Filho NA, Fe NF, Alves JMC. Flebotomíneos (Diptera: Psychodidae) no Estado de Roraima, Brazil. II. Espécies coletadas na região Norte. Acta Amaz. 1991; 21: 45-50.
Castellón et al. 1991b	Castellón EG, Araújo Filho NA, Fe NF, Alves JMC. Flebotomíneos (Diptera: Psychodidae) no Estado de Roraima. III. Listagem das espécies no Estado. Acta Amaz. 1991; 21: 51-54.
Castellón et al. 1994	Castellón EG, Arias JR, Freitas RA, Naiff RD. Os flebotomíneos da região amazonica, estrada Manaus-Humaitá, Estado do Amazonas, Brasil (Diptera: Psychodidae; Phlebotominae). Acta Amaz. 1994; 24(1-2): 91-102.
Castellón et al. 2000	Castellón EG, Fé NF, Buhrnheim PF, Fé FA. Flebotomíneos (Diptera, Psychodidae) na Amazônia. II. Listagem das espécies coletadas na bacia petrolífera no Rio Urucu, Amazonas, Brasil, utilizando diferentes armadilhas e iscas. Rev Bras Zool. 2000; 17(2): 455-462.
Castellón-Bermúdez 2009	Castellón-Bermudez EG. Lutzomyia sand flies in the Brazilian Amazon basin. Brasilia: Ed. INPA; 2009.
Sand fly collection - CPqRR	Sand fly collection - Centro de Pesquisas René Rachou - Fundação Oswaldo Cruz
Sand fly collection - Forattini	Sand fly collection - Faculdade de Saúde Pública - Universidade de São Paulo
Sand fly collection - IEC	Sand fly collection - Laboratório de Leishmanioses Prof. Dr. Ralph Lainson - Instituto Evandro Chagas
Sand fly collection - MZUSP	Sand fly collection - Museu de Zoologia - Universidade de São Paulo
Sand fly collection - Sherlock	Sand fly collection - Faculdade de Saúde Pública - Universidade de São Paulo
Thiago Vasconcelos, personal communication	Thiago Vasconcelos, personal communication
Damasceno et al. 1949	Damasceno RG, Arouck R, Causey OR. Estudos sobre Flebótomos no Vale Amazônico parte IV. Contribuição ao conhecimento da distribuição geográfica e da incidência por tipo de captura, de 64 espécies identificadas. Rev Serv Espec Saúde Pública. 1949; 2: 817-842.
De Luca et al. 2003	De Luca AS, Vasconcelos HL, Barrett TV. Distribution of sandflies (Diptera: Phlebotominae) in forest remnants and adjacent matrix habitats in Brazilian Amazonia. Braz J Biol. 2003; 63(3): 401-410.
Dedet et al. 1985	Dedet JP, Pajot FX, Desjeux P, Goyot P, Chippaux JP, Geoffroy B. Natural hosts of Leishmania mexicana amazonensis Lainson and Shaw 1972 (Kinetoplastida: Trypanosomatidae) in French Guiana. Trans Roy Soc Trop Med Hyg. 1985; 79(3): 302-305.
Dias-Lima et al. 2002	Dias-Lima A, Bermúdez EC, Medeiros JF, Sherlock I. Estratificação vertical da fauna de flebótomos (Diptera, Psychodidae) numa floresta primária de terra firme da Amazônia Central, Estado do Amazonas, Brasil. Cad Saude Publica. 2002; 18(3): 823-832.
Dias-Lima et al. 2003	Dias-Lima AG, Castellón EG, Sherlock I. Flebotomíneos (Diptera: Psychodidae) de uma floresta primária de terra firme da estação experimental de silvicultura tropical, estado do Amazonas, Brasil. Acta Amaz. 2003; 33(2): 303-316.
Dorval et al. 2007	Dorval MEC, Alves TP, Oliveira AG, Brazil RP, Galati EAB, Cunha RV. Modification of Disney trap for capture of sand flies (Diptera: Psychodidae: Phlebotominae). Mem Inst Oswaldo Cruz. 2007; 102(7): 877-878.
Dorval et al. 2009	Dorval MEC, Cristaldo G, Rocha HC, Alves TP, Alves MA, Oshiro ET, et al. Phlebotomine fauna (Diptera: Psychodidae) of an American cutaneous leishmaniasis endemic area in thhe state of Mato Grosso do Sul, Brazil. Mem Inst Oswaldo Cruz. 2009; 104(5): 695-702.
Dorval et al. 2010	Dorval MEC, Alves TP, Cristaldo G, Rocha HC, Alves MA, Oshiro ET, et al. Sand Fly Captures with Disney traps in area of occurrence of Leishmania (Leishmania) amazonensis in the State of Mato Grosso do Sul, mid-western Brazil. Rev Soc Bras Med Trop. 2010; 43(5): 491-495.
Fairchild & Theodor 1971	Fairchild GB, Theodor O. On Lutzomyia flaviscutellata (Mangabeira) and L. olmeca (Vargas and Diaz-Nájera) (Diptera, Psychodidae). J Med Ent. 1971; 8(2): 153-159.
Fé et al. 1998	Fé NF, Freitas RA, Barrett TVPhlebotomine Sand Flies from São Gabriel da Cachoeira (State of Amazonas, Brazil) with a Description of Lutzomyia (Psychodopygus) douradoi n. sp. (Diptera: Psychodidae)Mem Inst Oswaldo Cruz 93(3): 331-6.1998
Feitosa & Castellon 2004	Feitosa MAC, Castellon EG. Fauna de flebotomíneos (Diptera: Psychodidae) em fragmentos florestais ao redor de conjuntos habitacionais na cidade de Manaus, Amazonas, Brasil. II. Estratificação horizontal. Acta Amaz. 2004; 34(1): 121-127.
Feitosa & Castellon 2006	Feitosa MAC, Castellon EG. Fauna de flebotomíneos (Diptera: Psychodidae) em fragmentos de floresta ao redor de conjuntos habitacionais na cidade de Manaus, Amazonas, Brasil. I. Estratificação vertical. Acta Amaz. 2006; 36(4): 539-548.
Feitosa et al. 2012	Feitosa MAC, Julião GR, Costa MDP, Belém B, Pessoa FAC. Diversity of sand flies in domiciliary environment of Santarém, state of Pará, Brazil: species composition and abundance patterns in rural and urban areas. Acta Amaz. 2012; 42(4): 507-514.
Feliciangeli 1988	Feliciangeli MD. La fauna flebótomica (Diptera, Psychodidae) en Venezuela: I. Taxonomia y distribución geográfica. Bol Dir Malariol San Amb. 1988; 28: 99-113.
Felipe et al. 2011	Felipe IMA, Aquino DMC, Kuppinger O, Santos MDC, Rangel MÊS, Barbosa DS, et al. Leishmania infection in humans, dogs and sandflies in a visceral leishmaniasis endemic area in Maranhão, Brazil. Mem Inst Oswaldo Cruz. 2011; 106(2): 207-211.
Ferreira et al. 2014	Ferreira JVS, dos Santos TV, dos Santos EM, Gorayeb IS. Phlebotomine sand flies (Diptera: Psychodidae) in forest fragments of Belém metropolitan area, Pará State, Brazil, with considerations on vectors of American cutaneous leishmaniasis agents. Rev Pan-Amaz Saude. 2014; 5(2): 29-35.
Figueira et al. 2013	Figueira EAG, Silva G, Chagas ECS, Shimabukuro PHF. Phlebotomine sandflies (Diptera: Psychodidae) from Lábrea, state of Amazonas, Brazil, with a description of Evandromyia (Aldamyia) apurinan Shimabukuro, Figueira & Silva, sp. nov. Mem Inst Oswaldo Cruz. 2013; 108(2): 280-287.
Floch & Abonnenc 1952	Floch H, Abonnenc E. Faune de l'Union française (ancienne faune d l'Empire français). XIV Diptères phlébotomes de la Guyane et des Antilles françaises. Paris: Office de la Recherche Scientifique Outre-Mer; 1952.
Forattini 1973	Forattini OP. Entomologia Médica. IV. Psychodidae. Leishmanioses. Bartonelose. São Paulo: Edgard Blucher; 1973.
Fouque et al. 2007	Fouque F, Gaborit P, Issaly J, Carinci R, Gantier JC, Ravel C, et al. Phlebotomine sand flies (Diptera: Psychodidae) associated with changing patterns in the transmission of the human cutaneous leishmaniasis in French Guiana. Mem Inst Oswaldo Cruz. 2007; 102(1): 35-40.
Fraiha et al. 1978	Fraiha H, Ward RD, Ready PD. Fauna antropofila de flebótomos da rodovia Transamazonica, Brasil. Bull P.A.H.O. 1978; 84: 134-139.
Fraiha et al. 1980	Fraiha H, Quintana J, Souza MCM. Considerações entomo-epidemiologicas sôbre a fauna de flebótomos de Iquitos, Peru (Diptera, Psychodidae, Phlebotominae). Rev Fund SESP. 1980; 15: 20-31.
Freitas et al. 2002	Freitas RA, Naiff RD, Barrett TV. Species diversity and flegellate infections in the sand fly fauna near Porto Grande, state of Amapá, Brazil (Diptera: Psychodidae. Kinetoplastida: Trypanosomatidae). Mem Inst Oswaldo Cruz. 2002; 97(1): 53-59.
Galati 2013	Galati EAB. Phlebotominae (Diptera, Psychodidae). Classificação, morfologia, terminologia e identificação de Adultos. 2013 (unpublished record)
Galati et al. 2006	Galati EAB, Nunes VLB, Boggiani PC, Dorval MEC, Cristaldo G, Rocha HC, et al. Phlebotomines (Diptera: Psychodidae) in forested areas of the Serra da Bodoquena, state of Mato Grosso do Sul, Brazil. Mem Inst Oswaldo Cruz. 2006; 101(2): 175-193.
Garcez et al. 2009	Garcez LM, Soares DC, Chagas AP, Souza GCR, Miranda JFC, Fraiha H, et al. Etiology of cutaneous leishmaniasis and anthropophilic vectors in Juruti, Pará State, Brazil. Cad. Saúde Pública. 2009; 25(10): 2291-2295.
Gil et al. 2003	Gil LHS, Basano AS, Souza AA, Silva MGS, BarataI, Ishikawa EA, et al. Recent observations on the sand fly (Diptera: Psychodidae) fauna of the state of Rondônia, Western Amazonia, Brazil: the importance of Psychodopygus davisi as a vector of zoonotic cutaneous leishmaniasis. Mem Inst Oswaldo Cruz. 2003; 98(6): 751-755.
Gil et al. 2009	Gil LHS, Araújo MS, Villalobos JM, Camargo LMA, Ozaki LS, Fontes CJF, et al. Species structure of sand fly (Diptera: Psychodidae) fauna in the brazilian western Amazon. Mem Inst Oswaldo Cruz. 2009; 104(7): 955-959.
Gomes & Galati 1987	Gomes AC, Galati EAB. Aspectos ecológicos da leishmaniose tegumentar americana. 5. estratificação da atividade espacial e estacional de phlebotominae (Diptera, Psychodidae) em áreas de cultura agrícola da região do Vale do Ribeira, Estado de São Paulo, Brasil. Mem Inst Oswaldo Cruz. 1987; 82(4): 467-473.
Gomes & Galati 1989	Gomes AC, Galati EAB. Aspectos ecológicos da leishmaniose tegumentar americana. 7. Capacidade vetorial flebotomínea em ambiente florestal primário do sistema da Serra do Mar, região do Vale do ribeira, estado de São Paulo. Rev Saúde Publ S Paulo. 1989; 23(2): 136-142.
Gomes et al. 1990	Gomes AC, Galati EAB, Classer CM. Nota sobre encontro de phlebotominae (Diptera: Psychodidae) no litoral sul do estado de São Paulo, Brasil. Rev Saúde Publ S Paulo. 1990; 24(4): 319-320.
Gomes et al. 2009	Gomes LHM, Nery LCR, Pinheiro FG, Freitas RA, Franco AMR. Fauna de flebotomíneos (Diptera: Psychodidae: Phlebotominae) em terra firme e planície fluvial na área de influência do gasoduto Coari-Manaus, Amazonas, Brasil. Mem Inst Oswaldo Cruz. 2009; 97(1): 53-59.
Gomes et al. 2012	Gomes AC, Galati EAB, Paula MB, Mucci LF Phlebotomines in the area adjacent to the Porto Primavera Dam, between Sao Paulo and Mato Grosso do Sul States, Brazil. Rev Pat Trop. 2012; 41(2): 215-221.
Gomes et al. 2013	Gomes LHM, Albuquerque MIC, Rocha LC, Pinheiro FG, Franco AMR. Diversity and distribution of sandflies (Diptera: Psychodidae: Phlebotominae) in a military area in the state of Amazonas, Brazil. Mem Inst Oswaldo Cruz. 2013; 108(5): 651-656.
Gonzales & Devera 1999	González R, Devera R. Fauna flebotomínica (Diptera, Psychodidae, Phlebotominae) do Estado Bolívar, Venezuela. Rev Soc Bras Med Trop. 1999; 32(6): 721-723.
González et al. 1995	González R, Ledezma E, Jorquera A, de Sousa L, Devera R. Flebotomofauna em areas endemicas de leishmaniasis a distintos niveles altitudinales. Estado Anzoategui, Venezuela. Bol Dir Malariol y San Amb. 1995; 35(S1): 147-154.
Guerra et al. 2006	Guerra JAO, Ribeiro JAS, Coelho LIARC, Barbosa MGV, Paes MG. Epidemiologia da leishmaniose tegumentar na Comunidade São João, Manaus, Amazonas, Brasil. Cad Saude Publica. 2006; 22(11): 2319-2327.
Hervé et al. 1984	Hervé JP, Travassos da Rosa APA, Sa Filho GC, Travassos da Rosa JF, Pinheiro FP. Mise en evidence de la transmission transovarienne du virus Pacui chez Lutzomyia flaviscutellata (Phlebotominae). Consequences epidemiologiques. Cah Orstom (Ent Med Parasit). 1984; 22: 207-212.
Hudson & Young 1985	Hudson JE, Young DG. New records of phlebotomines, leishmaniasis and mosquitoes from Suriname. Trans Roy Soc Trop Med. 1985; 79(3): 418.
Kato et al. 2013	Kato H, Calvopiña M, Criollo H, Hashiguchi Y. First human cases of Leishmania (Viannia) naiffi infection in Ecuador and identification of its suspected vector species. Acta Trop. 2013; 128: 710-713.
Kent et al. 2013	Kent AD, Dos Santos TV, Gangadin A, Samjhawan A, Mans DRA, Schallig HDFH. Studies on the sand fly fauna (Diptera: Psychodidae) in high-transmission areas of cutaneous leishmaniasis in the Republic of Suriname. Parasit Vect. 2013; 2013(6): 318.
Lainson & Shaw 1968	Lainson R, Shaw JJ. Leishmaniasis in Brazil: I. Observations on enzootic rodent leishmaniasis - incrimination of Lutzomyia flaviscutellata (Mangabeira) as the vector in the lower amazonian basin. Trans Roy Soc Trop Med Hyg. 1968; 62(3): 385-395.
Lainson & Shaw 1969	Lainson R, Shaw JJ. Some reservoir hosts of Leishmania in wild animals of Mato Grosso State, Brazil. Two distinct strains of parasites isolated from man and rodents. Trans R Soc Trop Med Hyg. 1969; 63(3): 408-409.
Lainson et al. 1979	Lainson R, Shaw JJ, Ward RD, Ready PD, Naiff RD. Leishmaniasis in Brazil: XIII. Isolation of Leishmania from armadillos (Dasypus novemcitus) and observations on the epidemiology of cutaneous leishmaniasis in north Pará State. Trans Roy Soc Trop Med Hyg. 1979; 73(2): 239-242.
Lainson et al. 1983	Lainson R, Shaw JJ, Silveira FT, Fraiha H. Leishmaniasis in Brazil. XIX. Visceral leishmaniasis in the Amazon region, and the presence of Lutzomyia longipalpis on the Island of Marajó, Pará State. Trans Roy Soc Trop Med Hyg. 1983; 77(3): 323-330.
Lainson et al. 1992	Lainson R, Shaw JJ, Souza AA, Silveira FT, Falqueto A. Further observations on Lutzomyia ubiquitalis (Psychodidae: Phlebotominae), the sandfly vector of Leishmania (Viannia) lainsoni. Mem Inst Oswaldo Cruz. 1992; 87(3): 437-439.
Le Pont & Desjeux 1986	Le Pont F, Desjeux P. Leishmaniasis in Bolivia. II. The involvement of Psychodopygus yucumensis and Psychodopygus llanosmartinsi in the selvatic transmission cycle of Leishmania braziliensis braziliensis in a lowland subandean region. Mem Inst Oswaldo Cruz. 1986; 81: 311-318.
Le Pont 1990	Le Pont F. Attractivité du tatou (Dasypus novemcitus, L.) et des cobayes pour les phlébotomes em Guyane Française. Bull Soc Path Exot. 1990; 83: 671-676.
Léger et al. 1977	Léger N, Abonnenc E, Pajot FX, Kramer R, Claustre J. Liste commentée des phlébotomes de la Guyane Française. Cah Orstom (Ent Med Parasit). 1977; 15: 217-222.
Lewis 1975	Lewis DJ. The Lutzomyia flaviscutellata complex (Diptera: Psychodidae). J Med Ent. 1975; 12: 363-368.
Llanos 1973	Llanos BZ. Flebótomos de la selva Peruana (Diptera: Psychodidae). Rev Peru Ent. 1973; 16: 29-50.
Mauricio Vilela, personal communication	Mauricio Vilela, personal communication
Machado et al. 2012	Machado TA, Bragança MAL, Carvalho ML, Andrade Filho JD. Species diversity of sandflies (Diptera: Psychodidae) during different seasons and in different environments in the district of Taquaruçú, state of Tocantins, Brazil. Mem Inst Oswaldo Cruz. 2012; 107(7): 955-959.
Maciel & Missawa 2009	Maciel GBML, Missawa NA. Fauna flenotomínica (Diptera: Psychodidae) em aldeias indígenas do Estado de Mato Grosso. Rev Soc Bras Med Trop. 2009; 42(5): 597-602.
Mangabeira 1942	Mangabeira O. 7a. Contribuição ao estudo dos Flebotomus (Diptera: Psychodidae). Descrição dos machos de 24 novas espécies. Mem Inst Oswaldo Cruz. 1942; 37: 111-218.
Marinho et al. 2008	Marinho RM, Fonteles RS, Vasconcelos GC, Azevêdo PCB, Moraes JLP, Rebêlo JMM. Flebotomíneos (Diptera, Psychodidae) em reservas florestais da área metropolitana de São Luís, Maranhão, Brasil. Rev Bras Entomol. 2008; 52(1): 112-116.
Martins et al. 1962	Martins AV, Godoy JR TL, Silva JE. Nota sôbre os flebótomos de Petrópolis, estado do Rio de Janeiro, com a descrição de uma nova espécie (Diptera, Psychodidae). Rev Bras Biol. 1962; 22(1): 55-60.
Martins et al. 1963	Martins AV, Falcão AL, Silva JE. Notas sôbre os flebótomos do Território de Roraima, com a descrição de três novas espécies (Diptera, Psychodidae). Rev Bras Biol. 1963; 23(4): 334.
Martins et al. 1978	Martins AV, Williams P, Falcão AL. American Sandflies. Rio de Janeiro: Academia Brasileira de Ciências; 1978.
Martins et al. 2011	Martins FC, Moraes JLP, Figueiredo N, Rebêlo JMM. Estrutura da comunidade de Phlebotominae (Diptera, Psychodidae) em mata ciliar do município de Urbano Santos, Maranhão, Brasil. Iheringia Ser Zool. 2011; 101(1-2): 109-114.
Mascarenhas et al. 2009	Mascarenhas BM, Confalonieri UEC, Pinto CS, Vieira DBR, Guimarães DG. Distribuição Vertical de Lutzomyia (Diptera: Psychodidae: Phlebotominae) em Floresta de Terra Firme na Floresta Nacional de Caxiuanã. In Lisboa PLB, org. Caxiuanã: Desafios para a conservação de uma Floresta Nacional na Amazônia. Belém: Museu Paraense Emílio Goeldi; 2009. p. 474–483.
Missawa & Dias 2007	Missawa NA, Dias ES. Phlebotomine sand flies (Diptera: Psychodidae) in the municipality of Várzea Grande: an area of transmission of visceral leishmaniasis in the state of Mato Grosso, Brazil. Mem Inst Oswaldo Cruz. 2007; 102(8): 913-918.
Molina et al. 2008	Molina JA, Ortiz MI, Guhl F. Seasonality of Lutzomyia fairtigi (Diptera: Psychodidae: Phlebotominae), a species endemic to Eastern Colombia. Mem Inst Oswaldo Cruz. 2008; 103(5): 477-482.
Nunes et al. 2008	Nunes VLB, Galati EAB, Cardozo C, Rocca MEG, Andrade ARO, Santos MFC, et al. Estudo de flebotomíneos (Diptera, Psychodidae) em área urbana do município de Bonito, Mato Grosso do Sul, Brasil. Rev Bras Entomol. 2008; 52(3): 446-451.
Oliveira et al. 2003	Oliveira AG, Andrade Filho JD, Falcão AL, Brazil RP. Estudo de flebotomíneos (Diptera, Psychodidae, Phlebotominae) na zona urbana da Cidade de Campo Grande, Mato Grosso do Sul, Brasil, 1999-2000. Cad Saude Publ. 2003; 19(4): 933-944.
Oliveira et al. 2006	Oliveira AG, Galati EAB, Oliveira O, Oliveira GR, Espindola IAC, Dorval MEC, et al. Abundance of Lutzomyia longipalpis (Diptera: Psychodidae: Phlebotominae) and urban transmission of visceral leishmaniasis in Campo Grande, state of Mato Grosso do Sul, Brazil. Mem Inst Oswaldo Cruz. 2006; 101(8): 869-874.
Oliveira et al. 2011	Oliveira DMS, Saraiva EM, Ishikawa AY, Sousa AAA, Silva EO, Silva IM. Distribution of phlebotomine fauna (Diptera: Psychodidae) across na urban-rural gradient in an area of endemic visceral leishmaniasis in northern Brazil. Mem Inst Oswaldo Cruz. 2011; 106(8): 1039-1044.
Oliveira et al. 2012	Oliveira AG, Galati EAB, Fernandes CE, Dorval MEC, Brazil RP. Ecological aspects of phlebotomines (Diptera: Psychodidae) in endemic area of visceral leishmaniasis, Campo Grande, State of Mato Grosso do Sul, Brazil. J Med Entomol. 2012; 49(1): 43-50.
Pereira 2013	Pereira TA. Estudo da Fauna e Pesquisa de Infecção Natural por Leishmania spp. De Flebotomíneos (Diptera: Psychodidae) do Município de Rio Branco (Acre, Brasil) Empregando Ensaios Moleculares. M. Sc. Thesis, Instituto Oswaldo Cruz. 2013.
Pifano et al. 1973	Pifano F, Morell JR, Álvarez A. Comprobacion de uma cepa de leishmania dermotropa em Phlebotomus flaviscutellata Mangabeira, 1942 de la Sierra Parima, Territorio Federal Amazonás, Venezuela. Arch Venez Med Trop Parasit Med. 1973; 5: 146-167.
Pinto et al. 2010	Pinto IS, Santos CB, Ferreira AL, Falqueto A. Richness and diversity of sand flies (Diptera, Psychodidae) in an Atlantic rainforest reserve in southeast Brazil. J Vector Ecol. 2010; 35(2): 325-332.
Queiroz et al. 2012	Queiroz MFM, Varjão JR, Moraes SC, Salcedo GE. Analysis of sandflies (Diptera: Psychodidae) in Barra do Garças, State of Mato Grosso, Brazil, and the influence of environmental variables on the vector density of Lutzomyia longipalpis (Lutz & Neiva, 1912). Rev Soc Bras Med Trop. 2012; 45(3): 313-317.
Rado Covarrubias 2011	Rado Covarrubias CD. Estudos sobre os flebotomíneos (Diptera: Psychodidae: Phlebotominae) e os potenciais vetores de Leishmania spp. Na província de La Convención, Cusco, Perú. M.Sc. Thesis, Instituto Oswaldo Cruz. 2011.
Ramos et al. 2014	Ramos WR, Medeiros JF, Julião GR, Ríos-Velásquez CM, Marialva EF, Desmouliére SJM, et al. Anthropic effects on sand fly (Diptera: Psychodidae) abundance and diversity in an Amazonian rural settlement, Brazil. Acta Trop. 2014; 139: 44-52.
Ready et al. 1983	Ready PD, Lainson R, Shaw JJ. Leishmaniasis in Brazil. XX. Prevalence of "enzootic rodent leishmaniasis" (Leishmania mexicana amazonensis), and apparent absence of "pian bois" (Le. Braziliensis guyanensis), in plantations of introduced tree species and in other non-climax forests in eastern Amazonia. Trans Roy Soc Trop Med Hyg. 1983; 77: 775-785.
Ready et al. 1986	Ready PD, Lainson R, Shaw JJ, Ward RD. The ecology of Lutzomyia umbratilis Ward & Fraiha (Diptera: Psychodidae), the major vector to man of Leishmania braziliensis guyanensis in north-eastern Amazonian Brazil. Bull Ent Res. 1986; 76(1): 21-40.
Rebelo & Oliveira-Pereira 2001	Rebelo JMM, Oliveira-Pereira YN. Flebotomíneos (Diptera, Psychodidae) de matas de terra firme e de várzea, do município de Paragominas, estado do Pará, Brasil. Acta Amaz. 2001; 31(1): 145-154.
Rebelo et al. 1996	Rebelo JMM, Mendes WA, Costa JML, Cavaleiro N. Lista preliminar das espécies do gênero Lutzomyia, França, 1924 (Psychodidae, Phlebotominae) do Estado do Maranhão, Brasil. Cad Saude Publ. 1996; 12(4): 545-549.
Rebelo et al. 1999	Rebelo JMM, Araújo JAC, Carvalho ML, Barros VLL, Silva FS, Oliveira ST. Flebótomos (Diptera, Phlebotominae) da Ilha de São Luís, zona do Golfão Maranhense, Brasil. Rev Soc Bras Med Trop. 1999; 32(3): 247-253.
Rebelo et al. 2010	Rebelo JMM, Assunção-Junior NA, Silva O, Moraes JLP. Ocorrência de flebotomíneos (Diptera, Psychodidae) em focos de leishmnioses, em área de ecoturismo do entorno do Parque Nacional dos Lençóis Maranhenses, Brasil. Cad Saude Publ. 2010; 26(1): 195-198.
Reis et al. 2013	Reis SR, Gomes LHM, Ferreira NM, Nery LR, Pinheiro FG, Figueira LP, et al. Ocorrência de flebotomíneos (Diptera: Psychodidae: Phlebotominae) no ambiente peridomiciliar em área de foco de transmissão de leishmaniose tegumentar no município de Manaus, Amazonas. Acta Amaz. 2013; 43(1): 123-126.
Ribeiro et al. 2007	Ribeiro ALM, Missawa NA, Zeilhofer P. Distribution of phlebotomine sandflies (Diptera: Psychodidae) of medical importance in Mato Grosso State, Brazil. Rev Inst Med Trop S Paulo. 2007; 49(5): 317-321.
Rocha et al. 2013	Rocha LC, Freitas RA, Franco AMR. Phlebotomine sand flies (Diptera: Psychodidae: Phlebotominae) in urban rainforest fragments, Manaus - Amazonas State, Brazil. Acta Trop. 2013; 126: 103-109.
Rodrigues et al. 2011	Rodrigues EAS, Andrade Filho JD, Limongi JE, Paula MBC. Sandfly fauna (Diptera: Psychodidae) in Parque do Sabiá Complex, Uberlândia, Minas Gerais, Brazil. Rev Inst Med Trop S Paulo. 2011; 53(5) 255-258.
Rotureau et al. 2006	Rotureau B, Gaborit P, Issaly J, Carinci R, Fouque F, Carme B. Diversity and ecology of sand flies (Diptera: Psychodidae: Phlebotominae) in Coastal French Guiana. Am J Trop Med Hyg. 2006; 75(1): 62-69.
Ryan 1986	Ryan L. Flebótomos do Estado do Pará, Brasil (Diptera: Psychodidae: Phlebotominae). Tech Doc No. 1. Belém: Instituto Evandro Chagas; 1986.
Ryan et al. 1987	Ryan L, Lainson R, Shaw JJ. Leishmaniasis in Brazil. XXIV. Natural flagellate infections of sandflies (Diptera: Psychodidae) in Pará State, with particular reference to the role of Psychodopygus wellcomei as the vector of Leishmania braziliensis braziliensis in the Serra dos Carajas. Trans Roy Soc Trop Med Hyg. 1987; 81: 353-359.
Sampaio et al. 2009	Sampaio RNR, Gonçalves MC, Leite VA, França BV, Santos G, Carvalho MSL, et al. Estudo da transmissão da leishmaniose tegumentar americana no Distrito Federal. Rev Soc Bras Med Trop. 2009; 42(6): 686-690.
Shaw & Lainson 1968	Shaw JJ, Lainson R. Leishmaniasis in Brazil: II. Observations on the enzootic rodent leishmaniasis in the lower Amazon region - the feeding habits of the vector, Lutzomyia flaviscutellata in reference to man, rodents and other animals. Trans Roy Soc Trop Med Hyg. 1968; 62(3): 396-405.
Shaw & Lainson 1972	Shaw JJ, Lainson R. Leishmaniasis in Brazil: VI. Observations on the seasonal variations of Lutzomyia flaviscutellata in different types of forest and its relationship to enzootic rodent leishmaniasis (Leishmania mexicana amazonensis). Trans Roy Soc Trop Med Hyg. 1972; 66(5): 709-717.
Shaw et al. 1972	Shaw JJ, Lainson R, Ward RD. Leishmaniasis in Brazil: VII. Further observations on the feeding habitats of Lutzomyia flaviscutellata (Mangabeira) with particular reference to its biting habits at different heights. Trans Roy Soc Trop Med Hyg. 1972; 66(5): 718-723.
Silva et al. 2007	Silva DF, Freitas RA, Franco AMR. Diversidade e abundância de flebotomíneos do gênero Lutzomyia (Diptera: Psychodidae) em áreas de mata do nordeste de Manacapuru, AM. Neotrop Entomol. 2007; 36(1): 138-144.
Silva et al. 2010a	Silva PES, Freitas RA, Silva DF, Alencar RB. Fauna de flebotomíneos (Diptera: Psychodidae) de uma reserva de campina do estado do Amazonas, e sua importância epidemiológica. Rev Soc Bras Med Trop. 2010; 43(1): 78-81.
Silva et al. 2010b	Silva FS, Carvalho LPC, Cardozo FP, Moraes JLP, Rebêlo JMM. Sand Flies (Diptera: Psychodidae) in a Cerrado Area of the Maranhão State, Brazil. Neotrop Entomol. 2010; 39(6): 1032-1038.
Souza et al. 2010	Souza AAA, Silveira FT, Lainson R, Barata IR, Silva MGS, Lima JAN, et al. The Phlebotomine fauna of Serra dos Carajás, Pará, Brazil, and its possible implication in the transmission of American tegumentary leishmaniasis. Rev Pan-Amaz Saude. 2010; 1(1): 45-51.
Teles et al. 2013	Teles CBG, Basano AS, Zagonel-Oliveira M, Campos JJ, Oliveira AFJ, Freitas RA, et al. Epidemiological aspects of American cutaneous leishmaniasis and phlebotomine sandfly population, in the municipality of Monte Negro, State of Rondônia, Brazil. Rev Soc Bras Med Trop. 2013; 46(1): 60-66.
Tikasingh 1975	Tikasingh ES. Observations on Lutzomyia flaviscutellata (Mangabeira) (Diptera: Psychodidae), a vector of enzootic leishmaniasis in Trinidad, West Indies. J Med Ent. 1975; 12(2): 228-232.
Trujillo et al. 2013	Trujillo AVT, Reina AEG, Orjuela AG, Suárez EP, Palomares JE, Alvarez LSB. Seasonal variation and natural infection of Lutzomyia antunesi (Diptera: Psychodidae: Phlebotominae), an endemic species in the Orinoquia region of Colombia. Mem Inst Oswaldo Cruz. 2013; 108(4): 463-469.
Vexenat et al. 1986	Vexenat JA, Barretto AC, Cuba CC, Marsden PD. Características epidemiológicas da leishmaniose tegumentar americana em uma região endêmica do estado da Bahia. III. Fauna Flebotomínica. Mem Inst Oswaldo Cruz. 1986; 81(3): 293-301.
Vilela et al. 2011	Vilela ML, Azevedo CG, Carvalho BM, Rangel EF. Phlebotomine fauna (Diptera: Psychodidae) and putative vectors of leishmaniases in impacted area by hydroelectric plant, state of Tocantins, Brazil. PLoS One. 2011; 6(12): e27721.
Vilela et al. 2013	Vilela ML, Pita-Pereira D, Azevedo CG, Godoy RE, Britto C, Rangel EF. The phlebotomine fauna (Diptera: Psychodidae) of Guaraí, state of Tocantins, with an emphasis on the putative vectors of American cutaneous leishmaniasis in rural settlement and periurban areas. Mem Inst Oswaldo Cruz. 2013; 108(5): 578-585.
Vivero et al. 2010	Vivero RJ, Bejarano EE, Castro M, Vélez A, Pérez JE, Pérez-Doria A, et al. Trece registros nuevos de Lutzomyia (Diptera: Psychodidae) para el departamento de Vichada, Orinoquia Colombiana. Biota Neotrop. 2010; 10(2): 401-404.
Ward 1976	Ward RD. The immature stages of some phlebotomine sandflies from Brazil (Diptera: Psychodidae). Syst Ent. 1976; 1: 227-240.
Ward et al. 1973	Ward RD, Shaw JJ, Lainson R, Fraiha H. Leishmaniasis in Brazil: VIII. Observations on the phlebotomine fauna of an area highly endemic for cutaneous leishmaniasis, in the Serra dos Carajás, Pará State. Trans Roy Soc Trop Med Hyg. 1973; 67(2): 174-183.
Wijers & Linger 1966	Wijers DJB, Linger R. Man-biting sandflies in Surinam (Dutch Guiana): Phebotomus anduzei as a possible vector of Leishmania braziliensis. Ann Trop Med Parasitol. 1966; 60(4): 501-508.
Young & Rogers 1984	Young DG, Rogers TE. The phlebotomine sand fly fauna (Diptera: Psychodidae) of Ecuador. J Med Ent. 1984; 21(5): 597-611.
Young 1979	Young DG. A review of the bloodsucking psychodid flies of Colombia (Diptera: Phlebotominae and Sycoracinae). Tech Bull 806, Agric. Exp. Station, IFAS, Univ. Florida, Gainesville. 1979.
Young et al. 1985	Young DG, Pérez JE, Romero G. New records of phlebotomine sand flies from Peru with a description of Lutzomyia oligodonta n. sp. from the Rimac Valley (Diptera: Psychodidae). Int J Ent. 1985; 27: 136-146.
